# Supplementary material for: Serum Levels of Adiponectin Are Strongly Associated with Lipoprotein Subclasses in Healthy Volunteers but Not in Patients with Metabolic Syndrome
Source: MDPI journal article supplement (doi:10.3390/ijms25095050), 2024-05-06
Supplement: s1 [file s1]

**Table S1.** Chronic medication in patients with MS.

| <b>Drug</b>                | <b>MS<br/>(N=65)</b> |
|----------------------------|----------------------|
| Metformin                  | 23 (35.4%)           |
| Sulfonylurea               | 6 (9.2%)             |
| Insulin                    | 5 (7.7%)             |
| Thiazolidinediones         | 3 (4.6%)             |
| GLP1-agonist               | 2 (3.1%)             |
| SGLT2-inhibitor            | 8 (12.3%)            |
| Statin                     | 23 (35.3%)           |
| Fibrates                   | 2 (3.1%)             |
| Omega-3 fatty acids        | 3 (4.6%)             |
| Perindopril                | 23 (35.4%)           |
| Ramipril                   | 13 (20.0%)           |
| Trandolapril               | 1 (1.5%)             |
| Lisinopril                 | 3 (4.6%)             |
| Angiotensin II antagonists | 6 (9.2%)             |
| Calcium channel blockers   | 23 (35.4%)           |
| Nebivolol                  | 6 (9.2%)             |
| Other $\beta$ -blockers    | 17 (13.1%)           |
| Moxonidine                 | 8 (12.3%)            |
| Urapidil                   | 1 (1.5%)             |
| Diuretics                  | 25 (38.5)            |

Data are presented as n (%). GLP1; glucagon-like peptide 1; MS, metabolic syndrome; SGLT2, sodium-glucose transporter 2.
