# Supplementary material for: Serum Levels of Adiponectin Are Strongly Associated with Lipoprotein Subclasses in Healthy Volunteers but Not in Patients with Metabolic Syndrome
Source: MDPI journal article supplement (doi:10.3390/ijms25095050), 2024-05-06
Supplement: s1 [file s1]

**Table S3.** Partial correlation analyses of serum levels of adiponectin with selected VLDL, IDL, and LDL parameters in HVs.

| Adiponectin (µg/mL) |         |        |         |        |         |        |         |        |
|---------------------|---------|--------|---------|--------|---------|--------|---------|--------|
| Variable<br>(mg/dL) | Model 1 |        | Model 2 |        | Model 3 |        | Model 4 |        |
|                     | r       | p      | r       | p      | r       | p      | r       | p      |
| <b>VLDL</b>         |         |        |         |        |         |        |         |        |
| VLDL-C              | -0.38   | 0.0025 | -0.37   | 0.0030 | -0.36   | 0.0042 | -0.29   | 0.0201 |
| VLDL1-C             | -0.35   | 0.0058 | -0.35   | 0.0063 | -0.33   | 0.0091 | -0.27   | 0.0360 |
| VLDL3-C             | -0.42   | 0.0006 | -0.38   | 0.0028 | -0.41   | 0.0010 | -0.35   | 0.0057 |
| VLDL-FC             | -0.37   | 0.0028 | -0.42   | 0.0008 | -0.36   | 0.0044 | -0.30   | 0.0189 |
| VLDL1-FC            | -0.40   | 0.0011 | -0.37   | 0.0032 | -0.39   | 0.0019 | -0.32   | 0.0101 |
| VLDL2-FC            | -0.38   | 0.0026 | -0.40   | 0.0013 | -0.36   | 0.0044 | -0.29   | 0.0224 |
| VLDL3-FC            | -0.38   | 0.0021 | -0.38   | 0.0025 | -0.36   | 0.0036 | -0.30   | 0.0164 |
| VLDL-TG             | -0.41   | 0.0010 | -0.41   | 0.0011 | -0.39   | 0.0015 | -0.33   | 0.0087 |
| VLDL1-TG            | -0.36   | 0.0043 | -0.36   | 0.0039 | -0.35   | 0.0052 | -0.29   | 0.0246 |
| VLDL2-TG            | -0.40   | 0.0011 | -0.40   | 0.0013 | -0.39   | 0.0019 | -0.32   | 0.0102 |
| VLDL3-TG            | -0.40   | 0.0015 | -0.39   | 0.0017 | -0.38   | 0.0024 | -0.32   | 0.0122 |
| VLDL-PL             | -0.40   | 0.0014 | -0.40   | 0.0016 | -0.38   | 0.0023 | -0.32   | 0.0119 |
| VLDL1-PL            | -0.41   | 0.0009 | -0.41   | 0.0010 | -0.39   | 0.0015 | -0.33   | 0.0083 |
| VLDL2-PL            | -0.42   | 0.0007 | -0.41   | 0.0009 | -0.40   | 0.0013 | -0.33   | 0.0080 |
| VLDL3-PL            | -0.41   | 0.0009 | -0.41   | 0.0011 | -0.40   | 0.0015 | -0.33   | 0.0084 |
| VLDL-apoB           | -0.39   | 0.0019 | -0.39   | 0.0021 | -0.37   | 0.0033 | -0.30   | 0.0160 |
| <b>IDL</b>          |         |        |         |        |         |        |         |        |
| IDL-FC              | -0.41   | 0.0009 | -0.41   | 0.0011 | -0.40   | 0.0014 | -0.33   | 0.0088 |
| IDL-TG              | -0.34   | 0.0074 | -0.34   | 0.0075 | -0.32   | 0.0106 | -0.25   | 0.0468 |
| <b>LDL</b>          |         |        |         |        |         |        |         |        |
| LDL4-C              | -0.30   | 0.0184 | -0.29   | 0.0218 | -0.31   | 0.0154 | -0.27   | 0.0308 |
| LDL5-C              | -0.41   | 0.0009 | -0.41   | 0.0011 | -0.41   | 0.0010 | -0.38   | 0.0025 |
| LDL5-FC             | -0.35   | 0.0048 | -0.35   | 0.0055 | -0.35   | 0.0057 | -0.34   | 0.0074 |
| LDL5-TG             | -0.37   | 0.0027 | -0.37   | 0.0032 | -0.35   | 0.0051 | -0.28   | 0.0292 |
| LDL4-PL             | -0.33   | 0.0095 | -0.32   | 0.0116 | -0.33   | 0.0083 | -0.30   | 0.0186 |
| LDL5-PL             | -0.43   | 0.0005 | -0.42   | 0.0007 | -0.42   | 0.0007 | -0.39   | 0.0017 |
| LDL4-apoB           | -0.36   | 0.0036 | -0.36   | 0.0046 | -0.37   | 0.0033 | -0.32   | 0.0106 |
| LDL5-apoB           | -0.42   | 0.0006 | -0.42   | 0.0007 | -0.42   | 0.0008 | -0.38   | 0.0024 |

Spearman partial correlation analyses were used to evaluate associations of the serum levels of adiponectin with the serum levels of lipoproteins in HVs, while accounting for covariates. *p*-values < 0.0005 are considered statistically significant after a Bonferroni correction for multiple testing. Model 1: Adjusted for age, sex, and BMI. Model 2: Adjusted for age, sex, BMI, and CRP. Model 3: Adjusted for age, sex, and waist circumference. Model 4: Adjusted for age, sex, and MetSSS. ApoB, apolipoprotein B; BMI, body mass index; C, cholesterol; FC, free cholesterol; HV, healthy volunteer; IDL, intermediate-density lipoprotein; LDL, low-density lipoprotein; MetSSS, metabolic syndrome severity score; PL, phospholipid; r, Spearman's correlation coefficient; TG, triglyceride, VLDL, very low-density lipoprotein.
