# Supplementary material for: Serum Levels of Adiponectin Are Strongly Associated with Lipoprotein Subclasses in Healthy Volunteers but Not in Patients with Metabolic Syndrome
Source: MDPI journal article supplement (doi:10.3390/ijms25095050), 2024-05-06
Supplement: s1 [file s1]

**Table S13.** Correlation analyses of serum levels of lipoprotein classes and subclasses with MetSSS, performed separately for the HVs and patients with MS.

| MetSSS              |           |                   |           |         |
|---------------------|-----------|-------------------|-----------|---------|
| Variable<br>(mg/dL) | HV (N=65) |                   | MS (N=65) |         |
|                     | r         | p-value           | r         | p-value |
| <b>VLDL</b>         |           |                   |           |         |
| VLDL-C              | 0.31      | 0.0111            | 0.14      | 0.2557  |
| VLDL1-C             | 0.36      | 0.0029            | 0.16      | 0.1977  |
| VLDL2-C             | 0.28      | 0.0261            | 0.12      | 0.3432  |
| VLDL3-C             | 0.26      | 0.0344            | 0.14      | 0.2632  |
| VLDL4-C             | 0.20      | 0.1055            | 0.09      | 0.4947  |
| VLDL5-C             | -0.09     | 0.4657            | -0.13     | 0.3109  |
| VLDL-FC             | 0.31      | 0.0134            | 0.14      | 0.2829  |
| VLDL1-FC            | 0.45      | <b>0.0001</b>     | 0.16      | 0.2158  |
| VLDL2-FC            | 0.33      | 0.0077            | 0.17      | 0.1810  |
| VLDL3-FC            | 0.27      | 0.0270            | 0.15      | 0.2192  |
| VLDL4-FC            | 0.18      | 0.1444            | 0.04      | 0.7355  |
| VLDL5-FC            | -0.19     | 0.1256            | 0.08      | 0.5444  |
| VLDL-TG             | 0.42      | 0.0005            | 0.18      | 0.1446  |
| VLDL1-TG            | 0.51      | <b>&lt;0.0001</b> | 0.16      | 0.1998  |
| VLDL2-TG            | 0.34      | 0.0055            | 0.14      | 0.2699  |
| VLDL3-TG            | 0.27      | 0.0272            | 0.16      | 0.2058  |
| VLDL4-TG            | 0.22      | 0.0806            | 0.15      | 0.2238  |
| VLDL5-TG            | -0.07     | 0.6069            | 0.13      | 0.3183  |
| VLDL-PL             | 0.35      | 0.0042            | 0.15      | 0.2228  |
| VLDL1-PL            | 0.49      | <b>&lt;0.000</b>  | 0.18      | 0.1415  |
| VLDL2-PL            | 0.37      | 0.0022            | 0.15      | 0.2344  |
| VLDL3-PL            | 0.29      | 0.0174            | 0.16      | 0.2042  |
| VLDL4-PL            | 0.25      | 0.0439            | 0.10      | 0.4263  |
| VLDL5-PL            | 0.01      | 0.9460            | 0.02      | 0.8556  |
| VLDL-apoB           | 0.30      | 0.0145            | 0.13      | 0.3201  |
| <b>IDL</b>          |           |                   |           |         |
| IDL-C               | 0.28      | 0.0235            | 0.07      | 0.5936  |
| IDL-FC              | 0.28      | 0.0259            | 0.05      | 0.6641  |
| IDL-TG              | 0.35      | 0.0038            | 0.15      | 0.2327  |
| IDL-PL              | 0.29      | 0.0171            | 0.06      | 0.6375  |
| IDL-apoB            | 0.25      | 0.0427            | 0.04      | 0.7639  |
| <b>LDL</b>          |           |                   |           |         |
| LDL-C               | 0.16      | 0.2069            | -0.16     | 0.1911  |
| LDL1-C              | -0.29     | 0.0174            | -0.26     | 0.0329  |
| LDL2-C              | -0.26     | 0.0383            | -0.10     | 0.4257  |
| LDL3-C              | -0.03     | 0.7824            | -0.20     | 0.1096  |
| LDL4-C              | 0.41      | 0.0007            | -0.20     | 0.1061  |
| LDL5-C              | 0.54      | <b>&lt;0.0000</b> | -0.15     | 0.2275  |
| LDL6-C              | 0.43      | 0.0004            | 0.16      | 0.1891  |
| LDL-FC              | 0.03      | 0.7978            | -0.24     | 0.0580  |
| LDL1-FC             | -0.31     | 0.0134            | -0.27     | 0.0307  |
| LDL2-FC             | -0.33     | 0.0078            | -0.08     | 0.5264  |
| LDL3-FC             | -0.18     | 0.1436            | -0.16     | 0.1946  |
| LDL4-FC             | 0.30      | 0.0147            | -0.22     | 0.0794  |
| LDL5-FC             | 0.48      | <b>0.0001</b>     | -0.20     | 0.1170  |
| LDL6-FC             | 0.36      | 0.0036            | 0.12      | 0.3281  |

|              |       |                   |       |        |
|--------------|-------|-------------------|-------|--------|
| LDL-TG       | 0.10  | 0.4183            | -0.05 | 0.6851 |
| LDL1-TG      | -0.18 | 0.1595            | -0.04 | 0.7358 |
| LDL2-TG      | -0.26 | 0.0342            | -0.04 | 0.7421 |
| LDL3-TG      | -0.17 | 0.1858            | -0.24 | 0.0543 |
| LDL4-TG      | 0.25  | 0.0411            | -0.21 | 0.0950 |
| LDL5-TG      | 0.41  | 0.0006            | -0.03 | 0.8229 |
| LDL6-TG      | 0.30  | 0.0146            | 0.21  | 0.0919 |
| LDL-PL       | 0.11  | 0.3620            | -0.20 | 0.1105 |
| LDL1-PL      | -0.32 | 0.0091            | -0.28 | 0.0252 |
| LDL2-PL      | -0.28 | 0.0215            | -0.13 | 0.3178 |
| LDL3-PL      | -0.06 | 0.6202            | -0.21 | 0.0901 |
| LDL4-PL      | 0.41  | 0.0006            | -0.22 | 0.0819 |
| LDL5-PL      | 0.54  | <b>&lt;0.0001</b> | -0.17 | 0.1864 |
| LDL6-PL      | 0.40  | 0.0011            | 0.16  | 0.1996 |
| LDL-apoB     | 0.25  | 0.0479            | -0.07 | 0.5970 |
| LDL1-apoB    | -0.32 | 0.0083            | -0.24 | 0.0505 |
| LDL2-apoB    | -0.29 | 0.0210            | -0.10 | 0.4403 |
| LDL3-apoB    | -0.04 | 0.7379            | -0.24 | 0.0584 |
| LDL4-apoB    | 0.42  | 0.0006            | -0.24 | 0.0532 |
| LDL5-apoB    | 0.53  | <b>&lt;0.0001</b> | -0.14 | 0.2680 |
| LDL6-apoB    | 0.43  | <b>0.0003</b>     | 0.18  | 0.1420 |
| <b>HDL</b>   |       |                   |       |        |
| HDL-C        | -0.43 | <b>0.0003</b>     | -0.18 | 0.1459 |
| HDL1-C       | -0.44 | <b>0.0003</b>     | 0.02  | 0.8768 |
| HDL2-C       | -0.41 | 0.0007            | 0.00  | 0.9960 |
| HDL3-C       | -0.31 | 0.0110            | -0.08 | 0.5371 |
| HDL4-C       | 0.14  | 0.2800            | -0.10 | 0.4172 |
| HDL-FC       | -0.48 | <b>0.0001</b>     | -0.16 | 0.2005 |
| HDL1-FC      | -0.41 | 0.0006            | -0.13 | 0.3062 |
| HDL2-FC      | -0.39 | 0.0013            | -0.17 | 0.1778 |
| HDL3-FC      | -0.22 | 0.0806            | -0.19 | 0.1197 |
| HDL4-FC      | 0.06  | 0.6529            | -0.11 | 0.3755 |
| HDL-TG       | -0.32 | 0.0086            | -0.06 | 0.6511 |
| HDL1-TG      | -0.52 | <b>&lt;0.0001</b> | -0.06 | 0.6570 |
| HDL2-TG      | -0.32 | 0.0100            | -0.04 | 0.7628 |
| HDL3-TG      | -0.13 | 0.3146            | 0.01  | 0.9452 |
| HDL4-TG      | 0.16  | 0.2081            | 0.02  | 0.8768 |
| HDL-PL       | -0.52 | <b>&lt;0.0001</b> | -0.19 | 0.1362 |
| HDL1-PL      | -0.46 | <b>0.0001</b>     | -0.02 | 0.8549 |
| HDL2-PL      | -0.44 | <b>0.0002</b>     | -0.02 | 0.8987 |
| HDL3-PL      | -0.35 | 0.0047            | -0.11 | 0.3633 |
| HDL4-PL      | 0.04  | 0.7552            | -0.10 | 0.4127 |
| HDL-apoA-I   | -0.48 | <b>&lt;0.0001</b> | -0.19 | 0.1236 |
| HDL1-apoA-I  | -0.47 | <b>0.0001</b>     | -0.05 | 0.6686 |
| HDL2-apoA-I  | -0.47 | <b>0.0001</b>     | 0.00  | 0.9938 |
| HDL3-apoA-I  | -0.34 | 0.0062            | 0.02  | 0.8488 |
| HDL4-apoA-I  | 0.13  | 0.3146            | -0.09 | 0.4522 |
| HDL-apoA-II  | 0.01  | 0.9530            | -0.06 | 0.6567 |
| HDL1-apoA-II | -0.36 | 0.0033            | 0.03  | 0.8053 |
| HDL2-apoA-II | -0.28 | 0.0227            | 0.06  | 0.6280 |
| HDL3-apoA-II | 0.00  | 0.9914            | 0.00  | 0.9836 |
| HDL4-apoA-II | 0.27  | 0.0327            | -0.06 | 0.6568 |

Spearman correlation analyses were used to evaluate the associations between the serum levels of lipoproteins and MetSSS. *p*-values < 0.0005 are considered statistically significant after a Bonferroni correction for multiple testing. ApoA-I, apolipoprotein A-I; apoA-II, apolipoprotein A-II; apoB, apolipoprotein B; C, cholesterol; FC, free

cholesterol; HV, healthy volunteer; HDL, high-density lipoprotein; IDL, intermediate-density lipoprotein; LDL, low-density lipoprotein; MetSSS, metabolic syndrome severity score; MS, metabolic syndrome patient; PL, phospholipid;  $r$ , Spearman's correlation coefficient; TG, triglyceride; VLDL, very low-density lipoprotein.
