# Supplementary material for: Serum Levels of Adiponectin Are Strongly Associated with Lipoprotein Subclasses in Healthy Volunteers but Not in Patients with Metabolic Syndrome
Source: MDPI journal article supplement (doi:10.3390/ijms25095050), 2024-05-06
Supplement: s1 [file s1]

**Table S6.** OPLS-DA VIP scores in HVs and patients with MS.

| HV           |            | MS           |            |
|--------------|------------|--------------|------------|
| Variable     | VIP score  | Variable     | VIP score  |
| LDL5-apoB    | 1,49338724 | LDL1-PL      | 2,35982012 |
| HDL1-PL      | 1,47992575 | LDL1-FC      | 2,30379512 |
| LDL5-PL      | 1,47566421 | LDL1-C       | 2,29319643 |
| LDL5-C       | 1,46705101 | LDL1-apoB    | 2,26299667 |
| HDL1-apoA-I  | 1,46469696 | HDL-FC       | 1,95893553 |
| HDL2-PL      | 1,44236795 | HDL-apoA-I   | 1,78121973 |
| HDL2-C       | 1,44114218 | HDL-PL       | 1,69304879 |
| HDL1-C       | 1,44044305 | HDL1-PL      | 1,57030139 |
| HDL-PL       | 1,4256839  | LDL3-FC      | 1,51785087 |
| HDL1-FC      | 1,39755129 | HDL1-FC      | 1,48221796 |
| HDL1-apoA-II | 1,37874257 | HDL-C        | 1,47311727 |
| LDL5-FC      | 1,35480922 | HDL3-C       | 1,43547135 |
| HDL-FC       | 1,33675104 | HDL1-apoA-I  | 1,41143951 |
| HDL-C        | 1,3310263  | LDL3-PL      | 1,37960908 |
| HDL2-apoA-I  | 1,33031037 | HDL3-FC      | 1,35390553 |
| LDL5-TG      | 1,32294126 | HDL3-apoA-I  | 1,34850803 |
| VLDL1-PL     | 1,30356611 | LDL3-apoB    | 1,34720563 |
| HDL2-FC      | 1,28669509 | HDL2-C       | 1,33606546 |
| VLDL1-TG     | 1,27730687 | HDL2-PL      | 1,33513416 |
| VLDL1-FC     | 1,25048359 | LDL3-C       | 1,33263027 |
| VLDL-TG      | 1,25030428 | HDL2-FC      | 1,31444091 |
| LDL6-apoB    | 1,2295365  | HDL3-PL      | 1,2853978  |
| HDL4-TG      | 1,20751233 | HDL1-C       | 1,25099635 |
| VLDL2-PL     | 1,20618747 | LDL4-FC      | 1,21203434 |
| LDL4-apoB    | 1,19910672 | LDL6-TG      | 1,21172135 |
| HDL-apoA-I   | 1,18720691 | LDL6-FC      | 1,19834965 |
| VLDL-PL      | 1,18435399 | LDL-FC       | 1,18187724 |
| VLDL-apoB    | 1,16834825 | VLDL5-C      | 1,17045164 |
| LDL6-C       | 1,16258369 | LDL2-PL      | 1,1104765  |
| VLDL2-TG     | 1,14795806 | HDL2-apoA-I  | 1,09141746 |
| VLDL1-C      | 1,14712528 | LDL6-PL      | 1,08817203 |
| IDL-TG       | 1,14113406 | LDL4-PL      | 1,07387001 |
| VLDL-FC      | 1,13525621 | LDL6-C       | 1,05741998 |
| VLDL-C       | 1,13005069 | LDL-PL       | 1,0201385  |
| VLDL3-PL     | 1,11876458 | LDL2-FC      | 1,00532741 |
| IDL-FC       | 1,1110435  | LDL4-C       | 1,00524318 |
| VLDL2-FC     | 1,10760696 | LDL4-apoB    | 0,99527422 |
| LDL4-PL      | 1,10697273 | LDL6-apoB    | 0,96850053 |
| LDL4-C       | 1,10068124 | LDL2-C       | 0,94173643 |
| VLDL3-C      | 1,09755611 | LDL2-apoB    | 0,93081073 |
| IDL-PL       | 1,09470529 | VLDL5-PL     | 0,92650281 |
| VLDL2-C      | 1,09335876 | LDL-C        | 0,90164187 |
| VLDL3-FC     | 1,08042699 | HDL4-FC      | 0,88854581 |
| IDL-C        | 1,06596238 | LDL3-TG      | 0,85713478 |
| VLDL3-TG     | 1,0571365  | HDL4-apoA-I  | 0,84730064 |
| HDL4-apoA-II | 1,05165916 | LDL2-TG      | 0,79064889 |
| LDL6-PL      | 1,04234319 | VLDL1-TG     | 0,68913437 |
| HDL1-TG      | 1,02428417 | VLDL1-PL     | 0,67928889 |
| IDL-apoB     | 1,02311745 | HDL4-PL      | 0,66300433 |
| LDL2-FC      | 1,01667751 | HDL-apoA-II  | 0,65519579 |
| LDL2-PL      | 1,00796734 | HDL1-apoA-II | 0,64531406 |
| LDL4-TG      | 0,99808297 | VLDL-TG      | 0,63706954 |
| LDL2-C       | 0,98914996 | VLDL2-TG     | 0,61849854 |
| LDL6-FC      | 0,97781325 | IDL-TG       | 0,60782994 |

|              |            |              |            |
|--------------|------------|--------------|------------|
| VLDL4-PL     | 0,9716503  | VLDL2-PL     | 0,58701437 |
| HDL2-apoA-II | 0,95653986 | LDL5-TG      | 0,53563375 |
| VLDL4-FC     | 0,93242494 | LDL-apoB     | 0,51593338 |
| VLDL4-TG     | 0,92659675 | VLDL1-FC     | 0,51102135 |
| LDL2-apoB    | 0,92443915 | VLDL3-TG     | 0,50867148 |
| VLDL4-C      | 0,918839   | VLDL5-FC     | 0,50287656 |
| LDL6-TG      | 0,87322415 | LDL4-TG      | 0,49927385 |
| LDL4-FC      | 0,85180907 | HDL3-apoA-II | 0,48955205 |
| HDL3-C       | 0,81960819 | VLDL5-TG     | 0,48110384 |
| HDL4-apoA-I  | 0,79239015 | VLDL3-PL     | 0,47883026 |
| HDL3-PL      | 0,77460414 | LDL5-apoB    | 0,45370801 |
| LDL-apoB     | 0,73203295 | VLDL-PL      | 0,45166542 |
| HDL3-apoA-I  | 0,7176559  | VLDL4-TG     | 0,44605848 |
| LDL-TG       | 0,71164004 | HDL-TG       | 0,43621322 |
| HDL4-PL      | 0,61271026 | HDL2-apoA-II | 0,38147476 |
| LDL1-PL      | 0,58731352 | VLDL1-C      | 0,37692477 |
| LDL1-apoB    | 0,56646299 | HDL1-TG      | 0,36808604 |
| LDL3-FC      | 0,56466196 | HDL4-C       | 0,36734389 |
| LDL1-FC      | 0,56427465 | VLDL3-FC     | 0,35730159 |
| HDL4-C       | 0,56261628 | HDL2-TG      | 0,34669962 |
| HDL4-FC      | 0,55935609 | LDL5-PL      | 0,34181715 |
| LDL1-C       | 0,55838663 | LDL5-C       | 0,33589411 |
| HDL3-TG      | 0,46134669 | HDL4-TG      | 0,32766006 |
| LDL2-TG      | 0,43524529 | VLDL-apoB    | 0,3241261  |
| HDL2-TG      | 0,42825967 | VLDL2-FC     | 0,3059116  |
| LDL-C        | 0,40856549 | VLDL4-FC     | 0,29235047 |
| HDL3-FC      | 0,3983612  | VLDL4-C      | 0,26962256 |
| LDL3-TG      | 0,3686273  | HDL4-apoA-II | 0,26251542 |
| LDL-PL       | 0,34317031 | IDL-PL       | 0,25391775 |
| HDL-apoA-II  | 0,33137242 | VLDL2-C      | 0,23557715 |
| LDL3-PL      | 0,3309615  | VLDL-FC      | 0,2247766  |
| LDL3-C       | 0,30205504 | HDL3-TG      | 0,1987866  |
| VLDL5-PL     | 0,29176307 | VLDL-C       | 0,19499652 |
| HDL-TG       | 0,24661595 | VLDL3-C      | 0,18023826 |
| LDL3-apoB    | 0,23962632 | LDL-TG       | 0,1338694  |
| HDL3-apoA-II | 0,20904614 | LDL1-TG      | 0,13368183 |
| LDL1-TG      | 0,16266827 | LDL5-FC      | 0,12519715 |
| LDL-FC       | 0,14409132 | VLDL4-PL     | 0,10608908 |
| VLDL5-C      | 0,05658013 | IDL-C        | 0,05822336 |
| VLDL5-FC     | 0,0548439  | IDL-apoB     | 0,05590506 |
| VLDL5-TG     | 0,02097973 | IDL-FC       | 0,00777274 |
