# Supplementary material for: Serum Levels of Adiponectin Are Strongly Associated with Lipoprotein Subclasses in Healthy Volunteers but Not in Patients with Metabolic Syndrome
Source: MDPI journal article supplement (doi:10.3390/ijms25095050), 2024-05-06
Supplement: s1 [file s1]

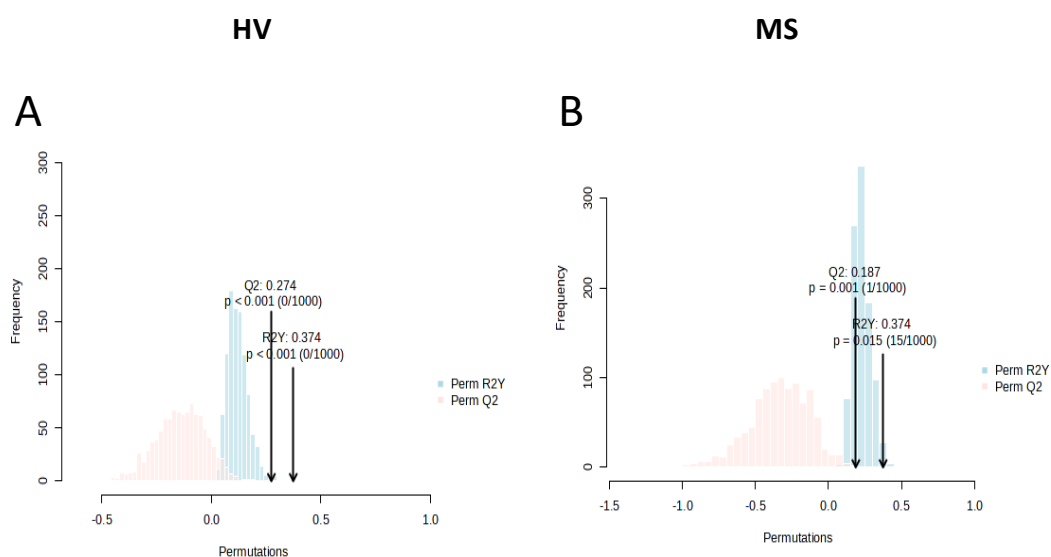

**Figure S1.** Permutation validity test of OPLS-DA analysis in (A) HVs and (B) patients with MS. OPLS-DA, orthogonal partial least squares discriminant analysis.
