# Supplementary material for: Serum Levels of Adiponectin Are Strongly Associated with Lipoprotein Subclasses in Healthy Volunteers but Not in Patients with Metabolic Syndrome
Source: MDPI journal article supplement (doi:10.3390/ijms25095050), 2024-05-06
Supplement: s1 [file s1]

**Table S10.** Correlation analyses of serum levels of lipoprotein classes and subclasses with waist circumference, performed separately for the HVs and patients with MS.

| Waist circumference (cm) |           |         |           |         |
|--------------------------|-----------|---------|-----------|---------|
| Variable<br>(mg/dL)      | HV (N=65) |         | MS (N=65) |         |
|                          | r         | p-value | r         | p-value |
| <b>VLDL</b>              |           |         |           |         |
| VLDL-C                   | 0.26      | 0.0349  | -0.13     | 0.2922  |
| VLDL1-C                  | 0.31      | 0.0115  | -0.16     | 0.2132  |
| VLDL2-C                  | 0.23      | 0.0700  | -0.15     | 0.2296  |
| VLDL3-C                  | 0.20      | 0.1128  | -0.09     | 0.4661  |
| VLDL4-C                  | 0.17      | 0.1839  | -0.09     | 0.4769  |
| VLDL5-C                  | 0.03      | 0.8008  | -0.06     | 0.6178  |
| VLDL-FC                  | 0.24      | 0.0499  | -0.15     | 0.2280  |
| VLDL1-FC                 | 0.38      | 0.0019  | -0.17     | 0.1876  |
| VLDL2-FC                 | 0.27      | 0.0285  | -0.11     | 0.3744  |
| VLDL3-FC                 | 0.23      | 0.0687  | -0.12     | 0.3573  |
| VLDL4-FC                 | 0.15      | 0.2204  | -0.14     | 0.2624  |
| VLDL5-FC                 | -0.15     | 0.2296  | -0.06     | 0.6312  |
| VLDL-TG                  | 0.32      | 0.0101  | -0.13     | 0.3143  |
| VLDL1-TG                 | 0.38      | 0.0017  | -0.14     | 0.2794  |
| VLDL2-TG                 | 0.27      | 0.0314  | -0.15     | 0.2275  |
| VLDL3-TG                 | 0.20      | 0.1034  | -0.11     | 0.3778  |
| VLDL4-TG                 | 0.16      | 0.1900  | -0.05     | 0.6976  |
| VLDL5-TG                 | 0.01      | 0.9532  | 0.07      | 0.5984  |
| VLDL-PL                  | 0.28      | 0.0242  | -0.14     | 0.2689  |
| VLDL1-PL                 | 0.40      | 0.0010  | -0.12     | 0.3235  |
| VLDL2-PL                 | 0.30      | 0.0137  | -0.14     | 0.2779  |
| VLDL3-PL                 | 0.23      | 0.0683  | -0.12     | 0.3517  |
| VLDL4-PL                 | 0.21      | 0.0945  | -0.08     | 0.5396  |
| VLDL5-PL                 | 0.08      | 0.5484  | 0.00      | 0.9716  |
| VLDL-apoB                | 0.25      | 0.0470  | -0.13     | 0.2927  |
| <b>IDL</b>               |           |         |           |         |
| IDL-C                    | 0.20      | 0.1154  | -0.13     | 0.3047  |
| IDL-FC                   | 0.19      | 0.1198  | -0.15     | 0.2327  |
| IDL-TG                   | 0.27      | 0.0283  | -0.18     | 0.1525  |
| IDL-PL                   | 0.18      | 0.1542  | -0.22     | 0.0799  |
| IDL-apoB                 | 0.14      | 0.2705  | -0.11     | 0.3729  |
| <b>LDL</b>               |           |         |           |         |
| LDL-C                    | 0.08      | 0.5081  | -0.08     | 0.5232  |
| LDL1-C                   | -0.25     | 0.0454  | -0.18     | 0.1412  |
| LDL2-C                   | -0.24     | 0.0555  | 0.11      | 0.3762  |
| LDL3-C                   | -0.09     | 0.4999  | -0.06     | 0.6512  |
| LDL4-C                   | 0.32      | 0.0103  | -0.13     | 0.2932  |
| LDL5-C                   | 0.41      | 0.0008  | -0.12     | 0.3564  |
| LDL6-C                   | 0.26      | 0.0387  | 0.02      | 0.8522  |
| LDL-FC                   | -0.05     | 0.7140  | -0.11     | 0.3811  |
| LDL1-FC                  | -0.26     | 0.0370  | -0.19     | 0.1364  |
| LDL2-FC                  | -0.31     | 0.0134  | 0.14      | 0.2770  |
| LDL3-FC                  | -0.20     | 0.1097  | -0.01     | 0.9072  |
| LDL4-FC                  | 0.23      | 0.0672  | -0.13     | 0.2947  |
| LDL5-FC                  | 0.38      | 0.0019  | -0.15     | 0.2364  |
| LDL6-FC                  | 0.26      | 0.0395  | 0.00      | 0.9686  |

|              |       |                   |       |        |
|--------------|-------|-------------------|-------|--------|
| LDL-TG       | -0.01 | 0.9445            | -0.11 | 0.3679 |
| LDL1-TG      | -0.19 | 0.1342            | -0.09 | 0.4733 |
| LDL2-TG      | -0.30 | 0.0147            | 0.04  | 0.7611 |
| LDL3-TG      | -0.18 | 0.1449            | -0.03 | 0.8017 |
| LDL4-TG      | 0.18  | 0.1569            | -0.13 | 0.3083 |
| LDL5-TG      | 0.30  | 0.0170            | -0.12 | 0.3216 |
| LDL6-TG      | 0.16  | 0.1938            | 0.07  | 0.5573 |
| LDL-PL       | 0.06  | 0.6612            | -0.08 | 0.5065 |
| LDL1-PL      | -0.27 | 0.0311            | -0.16 | 0.1910 |
| LDL2-PL      | -0.25 | 0.0464            | 0.10  | 0.4338 |
| LDL3-PL      | -0.11 | 0.4043            | -0.05 | 0.6822 |
| LDL4-PL      | 0.32  | 0.0090            | -0.15 | 0.2263 |
| LDL5-PL      | 0.41  | 0.0007            | -0.12 | 0.3549 |
| LDL6-PL      | 0.24  | 0.0556            | 0.02  | 0.8873 |
| LDL-apoB     | 0.14  | 0.2805            | -0.07 | 0.6018 |
| LDL1-apoB    | -0.28 | 0.0237            | -0.15 | 0.2352 |
| LDL2-apoB    | -0.26 | 0.0333            | 0.11  | 0.3840 |
| LDL3-apoB    | -0.10 | 0.4219            | -0.06 | 0.6086 |
| LDL4-apoB    | 0.30  | 0.0139            | -0.19 | 0.1351 |
| LDL5-apoB    | 0.39  | 0.0012            | -0.11 | 0.3912 |
| LDL6-apoB    | 0.25  | 0.0484            | 0.01  | 0.9240 |
| <b>HDL</b>   |       |                   |       |        |
| HDL-C        | -0.39 | 0.0013            | 0.00  | 0.9731 |
| HDL1-C       | -0.44 | <b>0.0002</b>     | 0.06  | 0.6360 |
| HDL2-C       | -0.34 | 0.0060            | 0.07  | 0.5663 |
| HDL3-C       | -0.24 | 0.0552            | -0.04 | 0.7320 |
| HDL4-C       | 0.12  | 0.3497            | 0.03  | 0.8279 |
| HDL-FC       | -0.43 | <b>0.0003</b>     | -0.04 | 0.7527 |
| HDL1-FC      | -0.43 | <b>0.0003</b>     | -0.06 | 0.6141 |
| HDL2-FC      | -0.35 | 0.0042            | -0.10 | 0.4477 |
| HDL3-FC      | -0.21 | 0.0889            | -0.12 | 0.3278 |
| HDL4-FC      | 0.07  | 0.5887            | -0.01 | 0.9451 |
| HDL-TG       | -0.29 | 0.0179            | -0.18 | 0.1477 |
| HDL1-TG      | -0.52 | <b>&lt;0.0001</b> | -0.12 | 0.3533 |
| HDL2-TG      | -0.28 | 0.0245            | -0.14 | 0.2820 |
| HDL3-TG      | -0.11 | 0.4019            | -0.14 | 0.2682 |
| HDL4-TG      | 0.11  | 0.3669            | -0.17 | 0.1673 |
| HDL-PL       | -0.46 | <b>0.0001</b>     | -0.06 | 0.6570 |
| HDL1-PL      | -0.46 | <b>0.0001</b>     | 0.02  | 0.8441 |
| HDL2-PL      | -0.38 | 0.0020            | 0.02  | 0.8455 |
| HDL3-PL      | -0.27 | 0.0325            | -0.07 | 0.5876 |
| HDL4-PL      | 0.07  | 0.5552            | -0.01 | 0.9541 |
| HDL-apoA-I   | -0.47 | <b>0.0001</b>     | -0.11 | 0.3749 |
| HDL1-apoA-I  | -0.49 | <b>&lt;0.0001</b> | 0.00  | 0.9903 |
| HDL2-apoA-I  | -0.47 | <b>0.0001</b>     | 0.02  | 0.8517 |
| HDL3-apoA-I  | -0.30 | 0.0147            | -0.03 | 0.8072 |
| HDL4-apoA-I  | 0.11  | 0.3875            | -0.02 | 0.8852 |
| HDL-apoA-II  | -0.06 | 0.6506            | -0.18 | 0.1449 |
| HDL1-apoA-II | -0.44 | <b>0.0002</b>     | -0.07 | 0.6012 |
| HDL2-apoA-II | -0.35 | 0.0040            | -0.07 | 0.5655 |
| HDL3-apoA-II | -0.04 | 0.7380            | -0.15 | 0.2421 |
| HDL4-apoA-II | 0.21  | 0.0865            | -0.06 | 0.6145 |

Spearman correlation analyses were used to evaluate the associations between the serum levels of lipoproteins and waist circumference. *p*-values < 0.0005 are considered statistically significant after a Bonferroni correction for multiple testing and are depicted in bold. ApoA-I, apolipoprotein A-I; apoA-II, apolipoprotein A-II; apoB,

apolipoprotein B; BMI, body mass index; C, cholesterol; FC, free cholesterol; HV, healthy volunteer; HDL, high-density lipoprotein; IDL, intermediate-density lipoprotein; IL-6, interleukin-6; LDL, low-density lipoprotein; MS, metabolic syndrome patient; PL, phospholipid; r, Spearman's correlation coefficient; TG, triglyceride; VLDL, very low-density lipoprotein.
