# Supplementary material for: Serum Levels of Adiponectin Are Strongly Associated with Lipoprotein Subclasses in Healthy Volunteers but Not in Patients with Metabolic Syndrome
Source: MDPI journal article supplement (doi:10.3390/ijms25095050), 2024-05-06
Supplement: s1 [file s1]

**Table S9.** Correlation analyses of serum levels of lipoprotein classes and subclasses with BMI, performed separately for the HVs and patients with MS.

| BMI (kg/m <sup>2</sup> ) |           |         |           |         |
|--------------------------|-----------|---------|-----------|---------|
| Variable<br>(mg/dL)      | HV (N=65) |         | MS (N=65) |         |
|                          | r         | p-value | r         | p-value |
| <b>VLDL</b>              |           |         |           |         |
| VLDL-C                   | 0.34      | 0.0060  | -0.12     | 0.3346  |
| VLDL1-C                  | 0.38      | 0.0017  | -0.12     | 0.3237  |
| VLDL2-C                  | 0.32      | 0.0093  | -0.14     | 0.2552  |
| VLDL3-C                  | 0.29      | 0.0192  | -0.10     | 0.4414  |
| VLDL4-C                  | 0.23      | 0.0630  | -0.07     | 0.5627  |
| VLDL5-C                  | 0.19      | 0.1316  | -0.06     | 0.6557  |
| VLDL-FC                  | 0.30      | 0.0138  | -0.13     | 0.2884  |
| VLDL1-FC                 | 0.40      | 0.0009  | -0.13     | 0.2926  |
| VLDL2-FC                 | 0.37      | 0.0022  | -0.12     | 0.3273  |
| VLDL3-FC                 | 0.32      | 0.0086  | -0.11     | 0.3705  |
| VLDL4-FC                 | 0.26      | 0.0366  | -0.11     | 0.3732  |
| VLDL5-FC                 | -0.02     | 0.9026  | 0.04      | 0.7800  |
| VLDL-TG                  | 0.32      | 0.0087  | -0.11     | 0.3808  |
| VLDL1-TG                 | 0.34      | 0.0049  | -0.10     | 0.4200  |
| VLDL2-TG                 | 0.31      | 0.0123  | -0.15     | 0.2213  |
| VLDL3-TG                 | 0.28      | 0.0260  | -0.14     | 0.2697  |
| VLDL4-TG                 | 0.23      | 0.0657  | -0.07     | 0.5971  |
| VLDL5-TG                 | 0.07      | 0.5974  | 0.12      | 0.3222  |
| VLDL-PL                  | 0.32      | 0.0093  | -0.12     | 0.3215  |
| VLDL1-PL                 | 0.41      | 0.0008  | -0.11     | 0.4016  |
| VLDL2-PL                 | 0.35      | 0.0040  | -0.13     | 0.2955  |
| VLDL3-PL                 | 0.29      | 0.0171  | -0.13     | 0.3034  |
| VLDL4-PL                 | 0.28      | 0.0242  | -0.08     | 0.5476  |
| VLDL5-PL                 | 0.23      | 0.0684  | 0.01      | 0.9530  |
| VLDL-apoB                | 0.30      | 0.0166  | -0.11     | 0.3647  |
| <b>IDL</b>               |           |         |           |         |
| IDL-C                    | 0.22      | 0.0850  | -0.08     | 0.5321  |
| IDL-FC                   | 0.23      | 0.0620  | -0.10     | 0.4171  |
| IDL-TG                   | 0.30      | 0.0154  | -0.15     | 0.2185  |
| IDL-PL                   | 0.19      | 0.1326  | -0.19     | 0.1304  |
| IDL-apoB                 | 0.13      | 0.3172  | -0.04     | 0.7734  |
| <b>LDL</b>               |           |         |           |         |
| LDL-C                    | 0.05      | 0.6671  | -0.10     | 0.4410  |
| LDL1-C                   | -0.05     | 0.6809  | -0.10     | 0.4303  |
| LDL2-C                   | -0.19     | 0.1298  | 0.15      | 0.2335  |
| LDL3-C                   | -0.02     | 0.8536  | -0.09     | 0.4843  |
| LDL4-C                   | 0.25      | 0.0420  | -0.22     | 0.0746  |
| LDL5-C                   | 0.18      | 0.1572  | -0.14     | 0.2497  |
| LDL6-C                   | -0.04     | 0.7402  | 0.05      | 0.6970  |
| LDL-FC                   | -0.02     | 0.8493  | -0.12     | 0.3267  |
| LDL1-FC                  | -0.07     | 0.5995  | -0.10     | 0.4134  |
| LDL2-FC                  | -0.26     | 0.0352  | 0.19      | 0.1392  |
| LDL3-FC                  | -0.17     | 0.1734  | -0.05     | 0.7158  |
| LDL4-FC                  | 0.17      | 0.1704  | -0.21     | 0.0922  |
| LDL5-FC                  | 0.15      | 0.2428  | -0.18     | 0.1619  |
| LDL6-FC                  | -0.10     | 0.4432  | 0.04      | 0.7672  |

|              |       |                   |       |        |
|--------------|-------|-------------------|-------|--------|
| LDL-TG       | -0.01 | 0.9422            | -0.05 | 0.7059 |
| LDL1-TG      | -0.06 | 0.6527            | 0.06  | 0.6165 |
| LDL2-TG      | -0.11 | 0.3805            | 0.15  | 0.2226 |
| LDL3-TG      | -0.18 | 0.1421            | 0.08  | 0.5488 |
| LDL4-TG      | 0.17  | 0.1732            | -0.13 | 0.3123 |
| LDL5-TG      | 0.18  | 0.1502            | -0.10 | 0.4136 |
| LDL6-TG      | -0.14 | 0.2630            | 0.09  | 0.4882 |
| LDL-PL       | 0.04  | 0.7405            | -0.09 | 0.4707 |
| LDL1-PL      | -0.07 | 0.5760            | -0.06 | 0.6412 |
| LDL2-PL      | -0.18 | 0.1406            | 0.13  | 0.3008 |
| LDL3-PL      | -0.03 | 0.7888            | -0.08 | 0.5403 |
| LDL4-PL      | 0.26  | 0.0382            | -0.23 | 0.0602 |
| LDL5-PL      | 0.18  | 0.1536            | -0.15 | 0.2327 |
| LDL6-PL      | -0.09 | 0.4927            | 0.04  | 0.7455 |
| LDL-apoB     | 0.08  | 0.5281            | -0.05 | 0.6750 |
| LDL1-apoB    | -0.08 | 0.5067            | -0.03 | 0.7937 |
| LDL2-apoB    | -0.20 | 0.1189            | 0.17  | 0.1822 |
| LDL3-apoB    | -0.01 | 0.9310            | -0.06 | 0.6075 |
| LDL4-apoB    | 0.24  | 0.0544            | -0.25 | 0.0409 |
| LDL5-apoB    | 0.18  | 0.1418            | -0.10 | 0.4251 |
| LDL6-apoB    | -0.02 | 0.8957            | 0.04  | 0.7217 |
| <b>HDL</b>   |       |                   |       |        |
| HDL-C        | -0.42 | 0.0005            | 0.01  | 0.9360 |
| HDL1-C       | -0.38 | 0.0017            | 0.17  | 0.1746 |
| HDL2-C       | -0.36 | 0.0035            | 0.14  | 0.2778 |
| HDL3-C       | -0.31 | 0.0109            | 0.00  | 0.9806 |
| HDL4-C       | -0.04 | 0.7481            | -0.09 | 0.4637 |
| HDL-FC       | -0.40 | 0.0009            | -0.05 | 0.6748 |
| HDL1-FC      | -0.39 | 0.0013            | 0.01  | 0.9475 |
| HDL2-FC      | -0.37 | 0.0025            | -0.01 | 0.9196 |
| HDL3-FC      | -0.32 | 0.0087            | -0.14 | 0.2732 |
| HDL4-FC      | -0.05 | 0.6733            | -0.13 | 0.2964 |
| HDL-TG       | -0.10 | 0.4510            | -0.10 | 0.4144 |
| HDL1-TG      | -0.30 | 0.0145            | 0.00  | 0.9909 |
| HDL2-TG      | -0.10 | 0.4475            | -0.02 | 0.9014 |
| HDL3-TG      | 0.04  | 0.7645            | -0.05 | 0.7036 |
| HDL4-TG      | 0.18  | 0.1561            | -0.21 | 0.0944 |
| HDL-PL       | -0.45 | <b>0.0002</b>     | 0.00  | 0.9697 |
| HDL1-PL      | -0.38 | 0.0018            | 0.15  | 0.2184 |
| HDL2-PL      | -0.37 | 0.0024            | 0.13  | 0.3171 |
| HDL3-PL      | -0.32 | 0.0086            | 0.00  | 0.9854 |
| HDL4-PL      | -0.09 | 0.4660            | -0.11 | 0.3627 |
| HDL-apoA-I   | -0.45 | <b>0.0001</b>     | -0.13 | 0.3065 |
| HDL1-apoA-I  | -0.39 | 0.0014            | 0.11  | 0.3766 |
| HDL2-apoA-I  | -0.48 | <b>&lt;0.0001</b> | 0.11  | 0.3859 |
| HDL3-apoA-I  | -0.32 | 0.0085            | 0.02  | 0.8643 |
| HDL4-apoA-I  | -0.02 | 0.8894            | -0.17 | 0.1790 |
| HDL-apoA-II  | -0.20 | 0.1169            | -0.15 | 0.2435 |
| HDL1-apoA-II | -0.41 | 0.0008            | 0.02  | 0.8456 |
| HDL2-apoA-II | -0.36 | 0.0030            | 0.05  | 0.6862 |
| HDL3-apoA-II | -0.12 | 0.3599            | -0.05 | 0.6749 |
| HDL4-apoA-II | 0.04  | 0.7599            | -0.20 | 0.1190 |

Spearman correlation analyses were used to evaluate the associations between the serum levels of lipoproteins and BMI. *p*-values < 0.0005 are considered statistically significant after a Bonferroni correction for multiple testing and are depicted in bold. ApoA-I, apolipoprotein A-I; apoA-II, apolipoprotein A-II; apoB, apolipoprotein B; BMI,

body mass index; C, cholesterol; FC, free cholesterol; HV, healthy volunteer; HDL, high-density lipoprotein; IDL, intermediate-density lipoprotein; IL-6, interleukin-6; LDL, low-density lipoprotein; MS, metabolic syndrome patient; PL, phospholipid; r, Spearman's correlation coefficient; TG, triglyceride; VLDL, very low-density lipoprotein.
