# Supplementary material for: Serum Levels of Adiponectin Are Strongly Associated with Lipoprotein Subclasses in Healthy Volunteers but Not in Patients with Metabolic Syndrome
Source: MDPI journal article supplement (doi:10.3390/ijms25095050), 2024-05-06
Supplement: s1 [file s1]

**Table S8.** Correlation analyses between the serum levels of adiponectin and clinical and laboratory parameters, separately for HVs and patients with MS.

| Variable                           | Adiponectin (µg/mL) |                   |              |               |
|------------------------------------|---------------------|-------------------|--------------|---------------|
|                                    | HV<br>(N=65)        |                   | MS<br>(N=65) |               |
|                                    | r                   | p                 | r            | p             |
| Age (years)                        | 0.09                | 0.4635            | 0.04         | 0.7370        |
| BMI (kg/m <sup>2</sup> )           | -0.31               | <b>0.0112</b>     | -0.09        | 0.4803        |
| WC (cm)                            | -0.50               | <b>&lt;0.0001</b> | -0.18        | 0.1474        |
| MAP (mm Hg)                        | 0.05                | 0.7130            | 0.09         | 0.4683        |
| MetSSS                             | -0.60               | <b>&lt;0.0001</b> | -0.28        | <b>0.0217</b> |
| Protein (g/L)                      | -0.25               | <b>0.0457</b>     | -0.13        | 0.2953        |
| Albumin (g/L)                      | -0.34               | <b>0.0061</b>     | -0.13        | 0.2909        |
| Glucose (mmol/L)                   | -0.05               | 0.6743            | -0.10        | 0.4326        |
| CRP (µg/mL)                        | -0.16               | 0.2046            | -0.06        | 0.6458        |
| IL-6 (pg/mL)                       | -0.13               | 0.3117            | 0.13         | 0.2997        |
| Bilirubin (µmol/L)                 | -0.13               | 0.2908            | -0.13        | 0.3084        |
| AST (U/L)                          | -0.19               | 0.1298            | -0.11        | 0.3973        |
| ALT (U/L)                          | -0.33               | <b>0.0075</b>     | -0.17        | 0.1750        |
| AP (U/L)                           | 0.03                | 0.8321            | 0.16         | 0.2174        |
| GGT (U/L)                          | -0.48               | <b>0.0001</b>     | -0.35        | <b>0.0039</b> |
| LDH (U/L)                          | 0.09                | 0.5002            | 0.17         | 0.1872        |
| Urea (mmol/L)                      | -0.18               | 0.1412            | 0.00         | 0.9747        |
| Urate (µmol/L)                     | -0.43               | <b>0.0004</b>     | -0.37        | <b>0.0024</b> |
| Creatinine (µmol/L)                | -0.37               | <b>0.0026</b>     | -0.30        | <b>0.0170</b> |
| eGFR (mL/min/1.73 m <sup>2</sup> ) | 0.01                | 0.9179            | 0.04         | 0.7754        |

Spearman correlation analyses were used to evaluate associations of the serum levels of adiponectin with clinical and laboratory parameters. *p*-values < 0.05 are considered statistically significant and are depicted in bold. ALT, alanine aminotransferase; AP, alkaline phosphatase; AST, aspartate aminotransferase; BMI, body mass index; CK, creatine kinase; CRP, C-reactive protein; eGFR, estimated glomerular filtration rate; GGT, gamma-glutamyl transpeptidase; HV, healthy volunteer; IL-6, interleukin 6; LDH, lactate dehydrogenase; MAP, mean arterial pressure; MetSSS, metabolic syndrome severity score; MS, metabolic syndrome patient; U, unit; WC, waist circumference.
