# Supplementary material for: Serum Levels of Adiponectin Are Strongly Associated with Lipoprotein Subclasses in Healthy Volunteers but Not in Patients with Metabolic Syndrome
Source: MDPI journal article supplement (doi:10.3390/ijms25095050), 2024-05-06
Supplement: s1 [file s1]

**Table S5.** Differences in serum levels of lipoprotein classes and subclasses between HVs and patients with MS with low and high adiponectin levels.

| Variable (mg/dL) | HV                        |                            |                    | MS                        |                            |         |
|------------------|---------------------------|----------------------------|--------------------|---------------------------|----------------------------|---------|
|                  | Low adiponectin<br>(N=33) | High adiponectin<br>(N=32) | p-value            | Low adiponectin<br>(N=33) | High adiponectin<br>(N=32) | p-value |
| <b>VLDL</b>      |                           |                            |                    |                           |                            |         |
| VLDL-C           | 23.21 (14.70, 26.92)      | 13.52 (9.53, 17.75)        | 0.0005             | 24.73 (16.59, 38.00)      | 23.39 (13.08, 40.59)       | 0.7628  |
| VLDL1-C          | 7.76 (4.85, 10.13)        | 4.20 (2.93, 5.60)          | 0.0006             | 9.50 (5.97, 15.88)        | 6.95 (4.53, 14.49)         | 0.5417  |
| VLDL2-C          | 3.12 (2.04, 4.16)         | 1.82 (1.27, 2.73)          | 0.0010             | 3.20 (2.09, 5.94)         | 3.21 (1.48, 6.52)          | 0.7035  |
| VLDL3-C          | 4.26 (2.44, 4.85)         | 2.03 (1.24, 3.35)          | <b>0.0003</b>      | 4.55 (2.82, 7.15)         | 4.89 (1.97, 7.93)          | 0.8337  |
| VLDL4-C          | 5.55 (4.06, 6.86)         | 3.83 (2.08, 5.14)          | 0.0033             | 5.97 (4.41, 8.32)         | 6.50 (3.99, 8.92)          | 0.7930  |
| VLDL5-C          | 1.15 (0.75, 1.58)         | 1.14 (0.95, 1.48)          | 0.5815             | 1.04 (0.68, 1.51)         | 1.28 (0.92, 1.77)          | 0.1470  |
| VLDL-FC          | 9.74 (6.69, 11.96)        | 6.49 (4.85, 7.89)          | 0.0007             | 10.79 (8.15, 16.00)       | 10.70 (6.46, 15.77)        | 0.7779  |
| VLDL1-FC         | 2.70 (1.80, 3.83)         | 1.14 (0.62, 1.75)          | <b>&lt; 0.0001</b> | 3.24 (2.32, 5.48)         | 2.83 (1.08, 4.53)          | 0.3348  |
| VLDL2-FC         | 1.18 (0.85, 1.84)         | 0.51 (0.32, 0.98)          | 0.0006             | 1.54 (0.84, 2.57)         | 1.38 (0.42, 2.69)          | 0.5461  |
| VLDL3-FC         | 1.74 (0.97, 2.37)         | 0.80 (0.53, 1.21)          | 0.0009             | 2.10 (1.39, 3.34)         | 2.13 (0.77, 3.39)          | 0.6134  |
| VLDL4-FC         | 2.40 (1.73, 3.10)         | 1.71 (0.98, 2.24)          | 0.0031             | 2.71 (2.11, 3.72)         | 3.24 (1.75, 4.45)          | 0.6042  |
| VLDL5-FC         | 0.53 (0.35, 0.89)         | 0.62 (0.41, 0.88)          | 0.7828             | 0.65 (0.44, 1.02)         | 0.81 (0.55, 0.99)          | 0.5461  |
| VLDL-TG          | 73.67 (52.61, 97.97)      | 40.86 (31.49, 58.49)       | <b>&lt; 0.0001</b> | 92.33 (68.83, 139.95)     | 92.58 (47.12, 123.98)      | 0.3186  |
| VLDL1-TG         | 30.04 (22.83, 48.25)      | 14.92 (9.28, 25.83)        | <b>&lt; 0.0001</b> | 48.34 (33.54, 77.59)      | 43.56 (20.97, 61.16)       | 0.2325  |
| VLDL2-TG         | 10.59 (7.34, 15.92)       | 5.94 (4.10, 9.05)          | <b>0.0003</b>      | 13.29 (9.34, 20.65)       | 13.16 (6.85, 22.29)        | 0.4311  |
| VLDL3-TG         | 9.67 (6.52, 14.08)        | 5.22 (3.92, 8.39)          | 0.0007             | 12.00 (8.46, 18.45)       | 13.02 (5.32, 19.86)        | 0.5997  |
| VLDL4-TG         | 8.66 (6.47, 10.19)        | 5.77 (4.32, 7.87)          | 0.0029             | 10.31 (8.80, 13.64)       | 10.50 (6.49, 13.55)        | 0.7379  |
| VLDL5-TG         | 2.44 (2.07, 3.01)         | 2.60 (2.24, 2.84)          | 0.6366             | 2.92 (2.48, 3.75)         | 3.06 (2.70, 3.48)          | 0.5075  |
| VLDL-PL          | 20.36 (13.84, 25.65)      | 12.55 (9.71, 16.34)        | <b>0.0003</b>      | 22.76 (18.22, 34.68)      | 22.77 (12.32, 31.99)       | 0.3722  |
| VLDL1-PL         | 5.67 (4.06, 7.96)         | 2.41 (1.26, 3.94)          | <b>&lt; 0.0001</b> | 7.82 (5.07, 12.30)        | 6.85 (3.35, 10.27)         | 0.2325  |
| VLDL2-PL         | 2.89 (2.18, 4.37)         | 1.54 (1.12, 2.38)          | <b>0.0002</b>      | 3.49 (2.40, 5.32)         | 3.25 (1.67, 5.71)          | 0.3549  |
| VLDL3-PL         | 3.64 (2.31, 5.00)         | 1.83 (1.38, 2.82)          | <b>0.0003</b>      | 4.38 (3.16, 6.47)         | 4.65 (1.96, 7.04)          | 0.4909  |
| VLDL4-PL         | 4.74 (3.44, 5.24)         | 3.27 (1.99, 4.15)          | 0.0015             | 5.17 (4.27, 6.87)         | 5.71 (3.43, 7.19)          | 0.9216  |
| VLDL5-PL         | 1.46 (1.15, 2.04)         | 1.42 (1.13, 1.74)          | 0.5996             | 1.67 (1.09, 2.12)         | 1.83 (1.49, 2.16)          | 0.3617  |
| VLDL-apoB        | 8.02 (5.69, 10.18)        | 5.15 (3.40, 6.61)          | 0.0007             | 9.20 (7.46, 13.36)        | 10.00 (5.54, 13.35)        | 0.7280  |
| <b>IDL</b>       |                           |                            |                    |                           |                            |         |
| IDL-C            | 17.97 (12.73, 20.55)      | 11.59 (8.80, 15.63)        | 0.0007             | 17.50 (14.04, 25.22)      | 21.90 (11.66, 27.79)       | 0.5906  |
| IDL-FC           | 5.04 (3.49, 5.95)         | 3.14 (2.40, 4.48)          | 0.0005             | 4.90 (3.80, 7.04)         | 6.01 (3.23, 8.00)          | 0.6698  |

| Variable (mg/dL) | HV                        |                            |                    | MS                        |                            |               |
|------------------|---------------------------|----------------------------|--------------------|---------------------------|----------------------------|---------------|
|                  | Low adiponectin<br>(N=33) | High adiponectin<br>(N=32) | p-value            | Low adiponectin<br>(N=33) | High adiponectin<br>(N=32) | p-value       |
| IDL-TG           | 9.55 (6.45, 15.53)        | 5.95 (3.63, 7.68)          | 0.0005             | 13.83 (9.85, 23.45)       | 12.84 (6.04, 21.74)        | 0.5331        |
| IDL-PL           | 8.42 (6.75, 10.68)        | 6.45 (5.54, 7.79)          | 0.0007             | 9.42 (6.47, 11.74)        | 9.96 (6.50, 12.80)         | 0.9164        |
| IDL-apoB         | 6.54 (4.50, 7.23)         | 4.42 (3.21, 5.57)          | 0.0013             | 6.59 (4.99, 8.57)         | 7.56 (5.08, 9.26)          | 0.6650        |
| <b>LDL</b>       |                           |                            |                    |                           |                            |               |
| LDL-C            | 145.49 (123.08, 162.27)   | 132.32 (121.78, 152.50)    | 0.2704             | 111.23 (79.10, 134.74)    | 119.64 (103.46, 152.17)    | 0.1280        |
| LDL1-C           | 29.09 (25.01, 36.00)      | 32.46 (27.43, 37.55)       | 0.1643             | 22.07 (16.38, 26.45)      | 29.09 (24.14, 36.66)       | <b>0.0004</b> |
| LDL2-C           | 22.62 (15.92, 29.65)      | 26.53 (25.29, 32.60)       | 0.0152             | 15.42 (10.13, 20.19)      | 19.32 (14.17, 22.47)       | 0.0856        |
| LDL3-C           | 22.44 (19.82, 29.08)      | 24.69 (21.73, 29.09)       | 0.3937             | 15.27 (7.12, 20.38)       | 19.91 (13.44, 24.59)       | 0.0346        |
| LDL4-C           | 22.49 (17.58, 27.92)      | 17.82 (14.35, 21.82)       | 0.0030             | 17.07 (8.94, 21.23)       | 18.35 (15.32, 24.86)       | 0.1894        |
| LDL5-C           | 21.48 (15.29, 26.40)      | 12.82 (10.32, 16.42)       | <b>&lt; 0.0001</b> | 17.25 (12.77, 23.77)      | 17.56 (13.10, 22.68)       | 0.8440        |
| LDL6-C           | 20.21 (18.11, 28.63)      | 17.12 (15.25, 20.89)       | 0.0022             | 22.38 (17.55, 30.23)      | 21.36 (16.02, 27.30)       | 0.3583        |
| LDL-FC           | 43.98 (37.84, 48.24)      | 41.37 (38.37, 47.17)       | 0.8491             | 35.25 (26.40, 40.63)      | 38.05 (33.11, 46.61)       | 0.0615        |
| LDL1-FC          | 9.25 (8.12, 10.93)        | 9.73 (8.72, 11.48)         | 0.2299             | 7.51 (6.10, 8.46)         | 9.54 (7.79, 11.70)         | <b>0.0003</b> |
| LDL2-FC          | 7.81 (5.32, 9.39)         | 8.78 (8.40, 10.63)         | 0.0092             | 5.56 (4.64, 7.30)         | 6.77 (5.61, 8.04)          | 0.0369        |
| LDL3-FC          | 7.63 (6.10, 9.09)         | 7.95 (7.54, 9.54)          | 0.0930             | 5.74 (3.80, 6.86)         | 6.85 (5.24, 7.84)          | 0.0192        |
| LDL4-FC          | 6.79 (6.07, 7.98)         | 5.89 (4.94, 7.01)          | 0.0341             | 5.48 (3.72, 6.67)         | 6.13 (5.05, 7.63)          | 0.0702        |
| LDL5-FC          | 6.16 (5.11, 7.18)         | 4.46 (3.75, 5.53)          | <b>0.0002</b>      | 5.38 (4.43, 6.67)         | 5.30 (4.77, 6.99)          | 0.6987        |
| LDL6-FC          | 6.16 (5.32, 7.08)         | 5.47 (4.81, 6.18)          | 0.0163             | 6.30 (5.59, 7.67)         | 6.49 (4.99, 7.33)          | 0.4992        |
| LDL-TG           | 20.79 (18.07, 24.52)      | 18.34 (16.05, 22.08)       | 0.0983             | 22.36 (20.16, 26.93)      | 24.54 (21.71, 30.71)       | 0.1985        |
| LDL1-TG          | 6.38 (5.28, 7.49)         | 6.29 (4.74, 7.59)          | 0.7628             | 7.03 (5.84, 8.16)         | 7.97 (6.71, 9.66)          | 0.0224        |
| LDL2-TG          | 2.64 (2.21, 2.93)         | 2.79 (2.15, 3.34)          | 0.2848             | 2.36 (2.00, 2.71)         | 2.90 (2.36, 3.30)          | 0.0205        |
| LDL3-TG          | 2.51 (1.92, 2.82)         | 2.60 (2.22, 3.16)          | 0.1622             | 2.23 (1.75, 2.68)         | 2.73 (2.01, 3.14)          | 0.0754        |
| LDL4-TG          | 2.80 (1.91, 3.20)         | 1.90 (1.48, 2.69)          | 0.0080             | 2.85 (1.99, 3.48)         | 2.98 (2.65, 4.25)          | 0.2619        |
| LDL5-TG          | 2.80 (1.94, 3.61)         | 1.64 (1.12, 2.13)          | <b>0.0003</b>      | 3.11 (2.35, 4.12)         | 3.00 (2.16, 4.31)          | 0.9216        |
| LDL6-TG          | 2.81 (2.51, 3.86)         | 2.68 (2.20, 3.10)          | 0.1471             | 3.98 (2.80, 4.86)         | 3.87 (2.89, 4.41)          | 0.3154        |
| LDL-PL           | 79.41 (67.88, 87.13)      | 73.41 (67.79, 83.31)       | 0.4159             | 62.46 (47.06, 74.91)      | 67.97 (60.71, 83.94)       | 0.0722        |
| LDL1-PL          | 16.25 (13.73, 19.15)      | 17.80 (14.91, 20.83)       | 0.1545             | 12.73 (10.76, 14.56)      | 16.39 (14.03, 20.30)       | <b>0.0003</b> |
| LDL2-PL          | 12.52 (8.79, 15.62)       | 14.56 (13.58, 17.45)       | 0.0079             | 8.62 (6.16, 11.04)        | 10.79 (7.78, 12.59)        | 0.0483        |
| LDL3-PL          | 12.12 (10.79, 15.59)      | 13.42 (11.83, 15.81)       | 0.2819             | 8.77 (4.68, 11.26)        | 11.11 (8.16, 13.57)        | 0.0253        |
| LDL4-PL          | 12.03 (9.73, 14.61)       | 9.69 (7.90, 11.90)         | 0.0018             | 9.56 (5.42, 11.50)        | 10.36 (8.86, 13.77)        | 0.1683        |
| LDL5-PL          | 11.74 (8.41, 13.79)       | 7.33 (5.85, 9.11)          | <b>&lt; 0.0001</b> | 9.59 (7.52, 12.60)        | 9.69 (7.59, 12.63)         | 0.9112        |

| Variable (mg/dL) | HV                        |                            |                    | MS                        |                            |               |
|------------------|---------------------------|----------------------------|--------------------|---------------------------|----------------------------|---------------|
|                  | Low adiponectin<br>(N=33) | High adiponectin<br>(N=32) | p-value            | Low adiponectin<br>(N=33) | High adiponectin<br>(N=32) | p-value       |
| LDL6-PL          | 11.82 (10.50, 14.81)      | 10.38 (9.39, 12.01)        | 0.0120             | 12.65 (10.70, 16.26)      | 12.64 (9.95, 14.76)        | 0.3865        |
| LDL-apoB         | 86.78 (74.95, 100.04)     | 77.95 (71.55, 91.22)       | 0.0682             | 72.84 (58.44, 91.11)      | 82.29 (73.03, 94.55)       | 0.1895        |
| LDL1-apoB        | 15.10 (13.04, 17.81)      | 16.62 (13.74, 19.62)       | 0.1399             | 12.21 (11.12, 14.41)      | 15.71 (13.35, 19.38)       | <b>0.0003</b> |
| LDL2-apoB        | 12.28 (9.20, 15.54)       | 14.59 (13.34, 16.94)       | 0.0160             | 9.64 (6.80, 11.51)        | 10.91 (8.62, 13.28)        | 0.0652        |
| LDL3-apoB        | 13.47 (11.65, 16.42)      | 14.27 (12.33, 16.43)       | 0.4505             | 10.00 (5.49, 12.43)       | 11.77 (9.26, 15.02)        | 0.0224        |
| LDL4-apoB        | 14.42 (11.66, 17.17)      | 10.72 (8.68, 13.62)        | 0.0005             | 12.30 (7.40, 15.15)       | 12.37 (10.28, 16.86)       | 0.1642        |
| LDL5-apoB        | 14.98 (10.46, 18.04)      | 8.94 (6.94, 11.52)         | <b>&lt; 0.0001</b> | 12.75 (9.92, 18.17)       | 13.00 (9.92, 17.21)        | 0.7379        |
| LDL6-apoB        | 16.84 (15.10, 22.74)      | 13.82 (11.83, 16.47)       | 0.0011             | 18.97 (15.56, 25.90)      | 17.19 (13.36, 23.33)       | 0.4010        |
| <b>HDL</b>       |                           |                            |                    |                           |                            |               |
| HDL-C            | 59.00 (53.04, 65.65)      | 71.82 (64.69, 82.81)       | <b>&lt; 0.0001</b> | 52.23 (45.11, 58.58)      | 54.36 (48.97, 66.09)       | 0.1643        |
| HDL1-C           | 16.64 (13.67, 18.38)      | 25.88 (18.79, 32.20)       | <b>&lt; 0.0001</b> | 14.52 (12.09, 17.96)      | 16.65 (13.96, 21.02)       | 0.0652        |
| HDL2-C           | 8.47 (7.71, 8.93)         | 10.91 (9.57, 13.31)        | <b>&lt; 0.0001</b> | 7.69 (6.50, 8.80)         | 8.61 (7.47, 10.07)         | 0.0394        |
| HDL3-C           | 11.26 (10.46, 13.13)      | 13.13 (11.61, 14.06)       | 0.0051             | 10.36 (9.25, 11.41)       | 10.75 (9.72, 12.50)        | 0.1471        |
| HDL4-C           | 23.02 (18.24, 25.09)      | 21.59 (18.05, 23.98)       | 0.2704             | 18.42 (15.99, 22.09)      | 19.16 (16.01, 22.71)       | 0.8956        |
| HDL-FC           | 14.26 (12.86, 15.62)      | 18.34 (16.23, 21.00)       | <b>&lt; 0.0001</b> | 12.79 (11.43, 14.61)      | 13.87 (12.84, 16.60)       | 0.0111        |
| HDL1-FC          | 5.01 (4.36, 5.45)         | 7.06 (5.43, 8.45)          | <b>&lt; 0.0001</b> | 4.18 (3.37, 5.07)         | 4.63 (4.14, 5.84)          | 0.0206        |
| HDL2-FC          | 2.47 (1.97, 2.85)         | 2.85 (2.62, 3.41)          | 0.0006             | 2.17 (1.92, 2.69)         | 2.38 (2.17, 2.73)          | 0.0652        |
| HDL3-FC          | 2.91 (2.39, 3.24)         | 3.07 (2.71, 3.47)          | 0.1526             | 2.31 (1.93, 2.97)         | 2.66 (2.27, 3.17)          | 0.0787        |
| HDL4-FC          | 5.02 (4.21, 5.66)         | 4.73 (3.76, 5.66)          | 0.3828             | 4.04 (3.63, 4.83)         | 4.67 (3.89, 5.23)          | 0.1765        |
| HDL-TG           | 9.66 (8.66, 11.02)        | 10.14 (8.66, 12.57)        | 0.3381             | 10.72 (8.60, 12.98)       | 12.79 (10.34, 14.06)       | 0.0330        |
| HDL1-TG          | 2.71 (2.09, 3.47)         | 3.84 (2.70, 5.06)          | 0.0041             | 2.81 (2.20, 3.81)         | 3.75 (3.44, 5.44)          | 0.0065        |
| HDL2-TG          | 1.56 (1.27, 2.02)         | 1.67 (1.53, 2.20)          | 0.2968             | 1.85 (1.51, 2.42)         | 2.23 (1.83, 2.69)          | 0.0341        |
| HDL3-TG          | 2.14 (1.77, 2.73)         | 2.16 (1.56, 2.41)          | 0.3756             | 2.60 (1.95, 3.07)         | 2.71 (2.15, 3.25)          | 0.2878        |
| HDL4-TG          | 3.60 (3.34, 4.12)         | 2.83 (2.10, 3.73)          | 0.0012             | 3.74 (3.22, 4.62)         | 3.82 (3.38, 4.74)          | 0.5861        |
| HDL-PL           | 80.86 (74.34, 88.47)      | 96.57 (89.80, 109.66)      | <b>&lt; 0.0001</b> | 72.70 (63.47, 80.93)      | 80.45 (69.46, 89.27)       | 0.0537        |
| HDL1-PL          | 19.04 (16.74, 22.11)      | 31.79 (22.25, 39.44)       | <b>&lt; 0.0001</b> | 18.38 (14.18, 20.57)      | 20.77 (17.18, 26.47)       | 0.0217        |
| HDL2-PL          | 12.98 (11.66, 14.46)      | 16.55 (14.36, 20.15)       | <b>&lt; 0.0001</b> | 12.01 (10.23, 13.84)      | 14.17 (11.29, 16.84)       | 0.0294        |
| HDL3-PL          | 17.99 (16.12, 20.19)      | 20.30 (18.27, 21.72)       | 0.0050             | 16.57 (15.23, 17.92)      | 18.38 (15.41, 19.81)       | 0.1489        |
| HDL4-PL          | 30.04 (26.35, 33.51)      | 29.46 (26.19, 32.64)       | 0.4584             | 26.64 (22.58, 30.71)      | 26.23 (24.08, 30.64)       | 0.6508        |
| HDL-apoA-I       | 159.24 (147.25, 171.76)   | 181.45 (167.49, 192.62)    | <b>0.0003</b>      | 148.31 (134.79, 164.49)   | 152.44 (142.31, 173.08)    | 0.0643        |
| HDL1-apoA-I      | 23.55 (19.48, 27.90)      | 41.00 (27.07, 53.20)       | <b>&lt; 0.0001</b> | 22.15 (17.59, 27.38)      | 26.67 (20.94, 33.67)       | 0.0284        |

| Variable (mg/dL) | HV                        |                            |               | MS                        |                            |         |
|------------------|---------------------------|----------------------------|---------------|---------------------------|----------------------------|---------|
|                  | Low adiponectin<br>(N=33) | High adiponectin<br>(N=32) | p-value       | Low adiponectin<br>(N=33) | High adiponectin<br>(N=32) | p-value |
| HDL2-apoA-I      | 18.04 (16.56, 19.81)      | 22.64 (19.47, 25.75)       | <b>0.0001</b> | 17.24 (15.14, 18.83)      | 18.38 (15.93, 21.73)       | 0.1939  |
| HDL3-apoA-I      | 28.76 (27.23, 33.09)      | 32.58 (29.62, 35.43)       | 0.0113        | 27.22 (24.66, 31.10)      | 30.27 (26.00, 33.36)       | 0.1123  |
| HDL4-apoA-I      | 86.74 (73.91, 92.49)      | 79.49 (69.91, 88.35)       | 0.1010        | 73.68 (68.33, 83.94)      | 77.01 (70.09, 87.02)       | 0.4388  |
| HDL-apoA-II      | 36.22 (32.78, 39.60)      | 35.31 (33.68, 38.33)       | 0.4466        | 33.77 (30.77, 36.85)      | 34.06 (31.61, 38.53)       | 0.6180  |
| HDL1-apoA-II     | 2.36 (1.88, 2.81)         | 3.85 (2.35, 4.95)          | 0.0008        | 2.01 (1.53, 2.41)         | 2.27 (1.82, 3.28)          | 0.2054  |
| HDL2-apoA-II     | 3.91 (3.49, 4.20)         | 4.34 (3.62, 4.84)          | 0.0261        | 3.51 (2.76, 4.20)         | 3.80 (3.01, 4.72)          | 0.5593  |
| HDL3-apoA-II     | 7.48 (6.96, 8.20)         | 7.21 (6.84, 7.86)          | 0.2008        | 7.08 (6.26, 8.19)         | 7.38 (6.44, 8.73)          | 0.5288  |
| HDL4-apoA-II     | 22.38 (18.96, 24.56)      | 19.00 (16.97, 22.14)       | 0.0057        | 19.23 (17.35, 22.50)      | 19.08 (16.95, 21.72)       | 0.6746  |

Data are presented as median (q1, q3). Differences between HVs and MS patients with low and high adiponectin were tested using the Mann-Whitney U test. Adiponectin levels in HV and MS below the median (15.1 µg/mL and 13.0 µg/mL, respectively) were defined as low and those ≥15.1 µg/mL and ≥13.0 µg/mL, respectively, as high adiponectin. *p*-values < 0.0005 are considered statistically significant after a Bonferroni correction for multiple testing and are depicted in bold. ApoA-I, apolipoprotein A-I; apoA-II, apolipoprotein A-II; apoB, apolipoprotein B; BMI, body mass index; C, cholesterol; FC, free cholesterol; HV, healthy volunteer; HDL, high-density lipoprotein; IDL, intermediate-density lipoprotein; LDL, low-density lipoprotein; MS, metabolic syndrome patient; PL, phospholipid; *r*, Spearman's correlation coefficient; TG, triglyceride; VLDL, very low-density lipoprotein.
