# Supplementary material for: Serum Levels of Adiponectin Are Strongly Associated with Lipoprotein Subclasses in Healthy Volunteers but Not in Patients with Metabolic Syndrome
Source: MDPI journal article supplement (doi:10.3390/ijms25095050), 2024-05-06
Supplement: s1 [file s1]

**Table S2.** Differences in serum levels of lipoproteins between HVs and patients with MS.

| Variable (mg/dL) | All<br>(N=130)       | HV<br>(N=65)         | MS<br>(N=65)        | p               |
|------------------|----------------------|----------------------|---------------------|-----------------|
| <b>VLDL</b>      |                      |                      |                     |                 |
| VLDL-C           | 20.5 (12.1, 32.2)    | 16.2 (11.2, 24.1)    | 24.2 (14.1, 39.1)   | 0.0005          |
| VLDL1-C          | 6.3 (4.0, 12.3)      | 5.4 (3.1, 8.1)       | 9.2 (5.0, 15.9)     | < <b>0.0001</b> |
| VLDL2-C          | 2.7 (1.6, 4.8)       | 2.3 (1.4, 3.5)       | 3.2 (1.7, 6.1)      | 0.0151          |
| VLDL3-C          | 3.7 (2.0, 5.6)       | 2.8 (1.9, 4.5)       | 4.6 (2.2, 7.5)      | 0.0015          |
| VLDL4-C          | 5.2 (3.7, 7.4)       | 4.5 (3.4, 6.1)       | 6.5 (4.3, 8.8)      | 0.0008          |
| VLDL5-C          | 1.2 (0.8, 1.6)       | 1.1 (0.8, 1.5)       | 1.2 (0.8, 1.6)      | 0.9166          |
| VLDL-FC          | 9.0 (6.1, 13.4)      | 7.6 (5.6, 10.6)      | 10.8 (6.6, 16.0)    | <b>0.0003</b>   |
| VLDL1-FC         | 2.3 (1.1, 4.1)       | 1.8 (0.9, 2.9)       | 3.2 (1.4, 5.0)      | <b>0.0002</b>   |
| VLDL2-FC         | 1.0 (0.5, 2.2)       | 0.9 (0.4, 1.5)       | 1.4 (0.7, 2.6)      | 0.0017          |
| VLDL3-FC         | 1.5 (0.8, 2.6)       | 1.1 (0.7, 2.0)       | 2.1 (0.9, 3.3)      | <b>0.0003</b>   |
| VLDL4-FC         | 2.4 (1.5, 3.6)       | 2.0 (1.3, 2.7)       | 3.0 (1.8, 4.3)      | <b>0.0003</b>   |
| VLDL5-FC         | 0.6 (0.4, 1.0)       | 0.6 (0.4, 0.9)       | 0.8 (0.5, 1.0)      | 0.0533          |
| VLDL-TG          | 69.3 (43.8, 116.4)   | 54.5 (39.0, 80.3)    | 92.3 (58.8, 131.9)  | < <b>0.0001</b> |
| VLDL1-TG         | 29.2 (18.7, 55.4)    | 25.1 (13.8, 39.4)    | 47.5 (26.2, 72.8)   | < <b>0.0001</b> |
| VLDL2-TG         | 10.3 (6.1, 18.1)     | 8.9 (5.0, 11.6)      | 13.3 (8.2, 21.1)    | < <b>0.0001</b> |
| VLDL3-TG         | 9.7 (5.6, 14.9)      | 7.6 (4.8, 11.9)      | 12.2 (6.6, 19.2)    | <b>0.0003</b>   |
| VLDL4-TG         | 8.8 (5.9, 11.6)      | 6.8 (5.2, 9.2)       | 10.3 (8.0, 13.6)    | < <b>0.0001</b> |
| VLDL5-TG         | 2.7 (2.4, 3.3)       | 2.6 (2.2, 2.9)       | 3.0 (2.6, 3.6)      | <b>0.0001</b>   |
| VLDL-PL          | 18.8 (12.4, 28.4)    | 15.6 (10.7, 21.5)    | 22.8 (14.3, 33.1)   | < <b>0.0001</b> |
| VLDL1-PL         | 4.8 (2.9, 9.3)       | 4.0 (2.3, 6.5)       | 7.5 (3.9, 11.4)     | < <b>0.0001</b> |
| VLDL2-PL         | 2.7 (1.6, 4.7)       | 2.2 (1.3, 3.1)       | 3.3 (1.9, 5.5)      | <b>0.0003</b>   |
| VLDL3-PL         | 3.5 (1.9, 5.2)       | 2.7 (1.7, 4.3)       | 4.4 (2.4, 6.7)      | <b>0.0003</b>   |
| VLDL4-PL         | 4.5 (3.1, 6.0)       | 3.8 (2.8, 4.9)       | 5.2 (3.9, 7.0)      | < <b>0.0001</b> |
| VLDL5-PL         | 1.6 (1.2, 2.0)       | 1.5 (1.1, 2.0)       | 1.8 (1.2, 2.1)      | 0.0539          |
| VLDL-apoB        | 7.9 (5.3, 11.0)      | 6.2 (4.1, 8.8)       | 9.2 (6.6, 13.4)     | < <b>0.0001</b> |
| <b>IDL</b>       |                      |                      |                     |                 |
| IDL-C            | 15.9 (11.1, 21.8)    | 14.5 (10.0, 18.9)    | 18.3 (13.3, 26.6)   | 0.0006          |
| IDL-FC           | 4.6 (3.1, 6.2)       | 4.0 (2.9, 5.4)       | 5.3 (3.8, 7.8)      | 0.0013          |
| IDL-TG           | 9.4 (5.5, 18.2)      | 7.1 (4.1, 11.6)      | 13.8 (7.3, 22.5)    | < <b>0.0001</b> |
| IDL-PL           | 7.8 (6.2, 11.1)      | 7.3 (6.1, 9.4)       | 9.4 (6.5, 12.7)     | 0.0199          |
| IDL-apoB         | 6.0 (4.5, 7.8)       | 5.4 (4.0, 6.9)       | 6.9 (5.1, 9.0)      | < <b>0.0001</b> |
| <b>LDL</b>       |                      |                      |                     |                 |
| LDL-C            | 125.1 (113.0, 153.1) | 137.4 (121.8, 154.3) | 117.1 (90.4, 148.1) | 0.0006          |
| LDL1-C           | 28.1 (23.4, 34.6)    | 30.4 (26.5, 36.7)    | 24.5 (21.3, 30.1)   | < <b>0.0001</b> |
| LDL2-C           | 21.6 (14.8, 26.6)    | 25.9 (20.1, 30.7)    | 17.4 (12.2, 22.3)   | < <b>0.0001</b> |
| LDL3-C           | 21.4 (15.4, 27.6)    | 23.8 (21.0, 29.1)    | 17.6 (9.9, 22.2)    | < <b>0.0001</b> |
| LDL4-C           | 19.2 (14.2, 24.2)    | 20.3 (15.8, 24.4)    | 17.9 (11.2, 24.1)   | 0.0519          |
| LDL5-C           | 16.5 (12.7, 22.3)    | 15.9 (12.4, 21.9)    | 17.4 (13.1, 23.8)   | 0.2434          |
| LDL6-C           | 20.1 (16.6, 25.8)    | 19.2 (16.5, 22.8)    | 22.1 (17.1, 28.8)   | 0.0387          |
| LDL-FC           | 38.7 (35.2, 46.3)    | 42.2 (38.0, 47.3)    | 37.3 (28.8, 45.1)   | 0.0011          |
| LDL1-FC          | 9.0 (7.7, 10.9)      | 9.5 (8.4, 11.3)      | 8.2 (7.1, 9.8)      | 0.0006          |
| LDL2-FC          | 7.5 (5.3, 8.9)       | 8.6 (6.7, 9.8)       | 6.4 (4.9, 7.7)      | < <b>0.0001</b> |
| LDL3-FC          | 7.2 (5.5, 8.6)       | 7.9 (7.1, 9.2)       | 6.5 (4.3, 7.3)      | < <b>0.0001</b> |
| LDL4-FC          | 6.2 (4.9, 7.4)       | 6.6 (5.3, 7.6)       | 5.8 (4.5, 7.1)      | 0.0463          |
| LDL5-FC          | 5.3 (4.4, 6.7)       | 5.3 (4.2, 6.5)       | 5.3 (4.6, 6.8)      | 0.2549          |
| LDL6-FC          | 6.1 (5.1, 7.1)       | 5.8 (4.9, 6.5)       | 6.4 (5.3, 7.6)      | 0.0226          |
| LDL-TG           | 21.7 (18.1, 25.9)    | 20.0 (16.5, 23.6)    | 23.8 (20.5, 28.3)   | < <b>0.0001</b> |

| Variable (mg/dL) | All<br>(N=130)       | HV<br>(N=65)         | MS<br>(N=65)         | p               |
|------------------|----------------------|----------------------|----------------------|-----------------|
| LDL1-TG          | 6.8 (5.7, 8.2)       | 6.4 (5.1, 7.6)       | 7.5 (6.3, 8.6)       | 0.0008          |
| LDL2-TG          | 2.6 (2.1, 3.2)       | 2.7 (2.1, 3.2)       | 2.6 (2.1, 3.2)       | 0.5220          |
| LDL3-TG          | 2.5 (1.9, 3.0)       | 2.5 (2.1, 3.0)       | 2.4 (1.9, 3.0)       | 0.3663          |
| LDL4-TG          | 2.7 (1.9, 3.4)       | 2.5 (1.6, 3.0)       | 2.9 (2.1, 3.6)       | 0.0026          |
| LDL5-TG          | 2.5 (1.8, 3.6)       | 2.0 (1.4, 3.0)       | 3.1 (2.2, 4.3)       | < <b>0.0001</b> |
| LDL6-TG          | 3.2 (2.6, 4.1)       | 2.8 (2.3, 3.4)       | 3.9 (2.9, 4.7)       | < <b>0.0001</b> |
| LDL-PL           | 70.9 (63.5, 83.3)    | 75.9 (67.9, 85.4)    | 66.6 (51.5, 80.2)    | 0.0015          |
| LDL1-PL          | 15.5 (13.3, 18.7)    | 16.6 (14.7, 19.7)    | 14.3 (12.1, 16.9)    | 0.0005          |
| LDL2-PL          | 12.1 (8.4, 14.5)     | 14.0 (11.1, 16.2)    | 9.6 (7.0, 12.4)      | < <b>0.0001</b> |
| LDL3-PL          | 11.9 (8.9, 15.0)     | 13.2 (11.3, 15.6)    | 10.1 (6.3, 12.4)     | < <b>0.0001</b> |
| LDL4-PL          | 10.4 (8.0, 13.0)     | 11.4 (9.0, 13.1)     | 10.2 (6.7, 12.9)     | 0.1051          |
| LDL5-PL          | 9.2 (7.3, 12.0)      | 8.7 (7.0, 11.8)      | 9.6 (7.5, 12.6)      | 0.1638          |
| LDL6-PL          | 11.6 (10.1, 14.3)    | 11.2 (10.0, 12.8)    | 12.6 (10.2, 15.3)    | 0.0291          |
| LDL-apoB         | 81.7 (70.0, 94.6)    | 82.3 (72.8, 94.9)    | 78.5 (65.0, 92.1)    | 0.2648          |
| LDL1-apoB        | 14.7 (12.7, 17.8)    | 15.3 (13.4, 18.4)    | 13.9 (11.5, 16.3)    | 0.0046          |
| LDL2-apoB        | 12.3 (8.9, 14.7)     | 13.8 (11.2, 16.4)    | 9.9 (7.3, 12.8)      | < <b>0.0001</b> |
| LDL3-apoB        | 12.5 (9.8, 15.6)     | 13.7 (12.0, 16.4)    | 10.8 (6.9, 13.2)     | < <b>0.0001</b> |
| LDL4-apoB        | 12.4 (9.4, 15.7)     | 13.4 (9.7, 15.3)     | 12.3 (8.4, 16.2)     | 0.4409          |
| LDL5-apoB        | 11.9 (9.2, 16.2)     | 11.3 (8.4, 15.2)     | 12.8 (9.9, 17.7)     | 0.0306          |
| LDL6-apoB        | 16.2 (13.6, 22.0)    | 15.8 (13.4, 18.0)    | 18.0 (14.1, 23.9)    | 0.0138          |
| <b>HDL</b>       |                      |                      |                      |                 |
| HDL-C            | 58.6 (51.3, 69.2)    | 65.2 (57.7, 74.5)    | 52.7 (47.9, 60.6)    | < <b>0.0001</b> |
| HDL1-C           | 17.2 (13.8, 22.5)    | 18.4 (15.1, 26.8)    | 15.7 (12.9, 20.1)    | 0.0011          |
| HDL2-C           | 8.6 (7.5, 10.2)      | 9.5 (8.3, 12.6)      | 8.2 (7.3, 9.7)       | 0.0012          |
| HDL3-C           | 11.2 (10.0, 13.2)    | 12.2 (10.7, 13.6)    | 10.4 (9.6, 11.9)     | <b>0.0001</b>   |
| HDL4-C           | 20.5 (17.2, 23.9)    | 22.3 (18.2, 24.7)    | 19.0 (16.0, 22.7)    | 0.0013          |
| HDL-FC           | 14.5 (12.5, 16.7)    | 16.0 (14.1, 18.9)    | 13.5 (11.8, 15.0)    | < <b>0.0001</b> |
| HDL1-FC          | 5.0 (4.1, 6.1)       | 5.4 (4.8, 7.4)       | 4.3 (3.7, 5.2)       | < <b>0.0001</b> |
| HDL2-FC          | 2.5 (2.1, 2.9)       | 2.7 (2.4, 3.1)       | 2.3 (2.0, 2.7)       | 0.0015          |
| HDL3-FC          | 2.8 (2.3, 3.2)       | 3.0 (2.6, 3.4)       | 2.5 (2.1, 3.0)       | 0.0012          |
| HDL4-FC          | 4.6 (3.9, 5.4)       | 4.9 (4.0, 5.7)       | 4.4 (3.8, 5.2)       | 0.0326          |
| HDL-TG           | 10.5 (9.0, 13.3)     | 9.9 (8.7, 11.8)      | 11.4 (9.7, 13.6)     | 0.0058          |
| HDL1-TG          | 3.3 (2.6, 4.4)       | 3.0 (2.5, 4.2)       | 3.6 (2.7, 4.6)       | 0.3258          |
| HDL2-TG          | 1.8 (1.5, 2.3)       | 1.6 (1.3, 2.1)       | 2.0 (1.6, 2.5)       | 0.0013          |
| HDL3-TG          | 2.3 (1.9, 2.8)       | 2.1 (1.7, 2.5)       | 2.7 (2.1, 3.1)       | <b>0.0002</b>   |
| HDL4-TG          | 3.6 (3.0, 4.3)       | 3.4 (2.5, 3.9)       | 3.7 (3.3, 4.7)       | <b>0.0003</b>   |
| HDL-PL           | 81.9 (72.1, 93.2)    | 89.4 (79.2, 99.8)    | 77.1 (67.5, 84.5)    | < <b>0.0001</b> |
| HDL1-PL          | 20.5 (16.8, 26.5)    | 22.1 (18.6, 33.9)    | 18.9 (14.8, 22.9)    | 0.0021          |
| HDL2-PL          | 13.8 (11.7, 15.9)    | 14.4 (12.6, 18.6)    | 13.2 (10.9, 15.4)    | 0.0175          |
| HDL3-PL          | 18.2 (15.9, 20.6)    | 19.1 (17.4, 20.9)    | 17.1 (15.2, 19.6)    | 0.0037          |
| HDL4-PL          | 28.8 (25.4, 31.8)    | 29.9 (26.4, 32.7)    | 26.3 (23.1, 30.7)    | 0.0033          |
| HDL-apoA-I       | 159.3 (144.5, 178.2) | 167.8 (155.7, 183.7) | 149.2 (138.1, 166.2) | < <b>0.0001</b> |
| HDL1-apoA-I      | 26.3 (20.0, 34.7)    | 27.5 (22.3, 45.4)    | 24.9 (18.5, 30.1)    | 0.0067          |
| HDL2-apoA-I      | 18.7 (16.3, 22.1)    | 19.6 (17.2, 23.3)    | 17.5 (15.2, 20.6)    | 0.0036          |
| HDL3-apoA-I      | 30.2 (26.7, 33.3)    | 30.8 (27.5, 33.5)    | 28.8 (24.9, 32.5)    | 0.0396          |
| HDL4-apoA-I      | 79.5 (70.8, 89.0)    | 81.9 (72.7, 91.1)    | 75.5 (68.3, 86.5)    | 0.0231          |
| HDL-apoA-II      | 35.2 (32.2, 38.4)    | 36.0 (33.6, 38.6)    | 33.8 (31.5, 37.5)    | 0.0389          |
| HDL1-apoA-II     | 2.4 (1.9, 3.5)       | 2.5 (2.1, 4.1)       | 2.1 (1.6, 3.0)       | 0.0058          |
| HDL2-apoA-II     | 3.9 (3.2, 4.6)       | 4.0 (3.5, 4.6)       | 3.7 (3.0, 4.5)       | 0.1107          |

| <b>Variable (mg/dL)</b> | <b>All<br/>(N=130)</b> | <b>HV<br/>(N=65)</b> | <b>MS<br/>(N=65)</b> | <b>p</b> |
|-------------------------|------------------------|----------------------|----------------------|----------|
| HDL3-apoA-II            | 7.3 (6.5, 8.2)         | 7.3 (6.9, 8.1)       | 7.1 (6.3, 8.4)       | 0.7392   |
| HDL4-apoA-II            | 19.8 (17.5, 22.6)      | 20.9 (18.4, 23.2)    | 19.2 (17.0, 21.9)    | 0.0600   |

Data are presented as median (q1, q3). Differences between HVs and patients with MS were tested using the Mann-Whitney U test. *p*-values < 0.0005 are considered statistically significant after a Bonferroni correction for multiple testing and are depicted in bold. ApoA-I, apolipoprotein A-I; apoA-II, apolipoprotein A-II; apoB, apolipoprotein B; C, cholesterol; FC, free cholesterol; HV, healthy volunteer; HDL, high-density lipoprotein; IDL, intermediate-density lipoprotein; LDL, low-density lipoprotein; MS, metabolic syndrome patient; PL, phospholipid; TG, triglyceride; VLDL, very low-density lipoprotein.
