# Supplementary material for: Serum Levels of Adiponectin Are Strongly Associated with Lipoprotein Subclasses in Healthy Volunteers but Not in Patients with Metabolic Syndrome
Source: MDPI journal article supplement (doi:10.3390/ijms25095050), 2024-05-06
Supplement: s1 [file s1]

**Table S12.** Correlation analyses of serum levels of lipoprotein classes and subclasses with CRP, performed separately for the HVs and patients with MS.

| CRP ( $\mu\text{g/mL}$ ) |           |         |           |         |
|--------------------------|-----------|---------|-----------|---------|
| Variable<br>(mg/dL)      | HV (N=65) |         | MS (N=65) |         |
|                          | r         | p-value | r         | p-value |
| <b>VLDL</b>              |           |         |           |         |
| VLDL-C                   | 0.13      | 0.2884  | -0.12     | 0.3595  |
| VLDL1-C                  | 0.10      | 0.4271  | -0.14     | 0.2751  |
| VLDL2-C                  | 0.15      | 0.2350  | -0.12     | 0.3536  |
| VLDL3-C                  | 0.16      | 0.2175  | -0.09     | 0.4789  |
| VLDL4-C                  | 0.16      | 0.1959  | -0.06     | 0.6257  |
| VLDL5-C                  | 0.00      | 0.9782  | -0.01     | 0.9331  |
| VLDL-FC                  | 0.09      | 0.4820  | -0.15     | 0.2342  |
| VLDL1-FC                 | 0.15      | 0.2473  | -0.14     | 0.2535  |
| VLDL2-FC                 | 0.12      | 0.3350  | -0.09     | 0.4798  |
| VLDL3-FC                 | 0.11      | 0.3872  | -0.09     | 0.4742  |
| VLDL4-FC                 | 0.17      | 0.1818  | -0.10     | 0.4457  |
| VLDL5-FC                 | -0.05     | 0.6638  | 0.04      | 0.7720  |
| VLDL-TG                  | 0.08      | 0.5063  | -0.12     | 0.3378  |
| VLDL1-TG                 | 0.04      | 0.7241  | -0.16     | 0.2161  |
| VLDL2-TG                 | 0.11      | 0.3681  | -0.12     | 0.3262  |
| VLDL3-TG                 | 0.08      | 0.5482  | -0.10     | 0.4345  |
| VLDL4-TG                 | 0.07      | 0.5970  | -0.09     | 0.4856  |
| VLDL5-TG                 | -0.05     | 0.7058  | 0.01      | 0.9216  |
| VLDL-PL                  | 0.09      | 0.4914  | -0.12     | 0.3593  |
| VLDL1-PL                 | 0.10      | 0.4268  | -0.10     | 0.4107  |
| VLDL2-PL                 | 0.15      | 0.2340  | -0.09     | 0.4949  |
| VLDL3-PL                 | 0.12      | 0.3420  | -0.08     | 0.5142  |
| VLDL4-PL                 | 0.15      | 0.2313  | -0.07     | 0.5969  |
| VLDL5-PL                 | 0.01      | 0.9257  | 0.03      | 0.8428  |
| VLDL-apoB                | 0.08      | 0.5225  | -0.08     | 0.5354  |
| <b>IDL</b>               |           |         |           |         |
| IDL-C                    | 0.22      | 0.0848  | -0.03     | 0.7926  |
| IDL-FC                   | 0.21      | 0.0979  | -0.08     | 0.5422  |
| IDL-TG                   | 0.05      | 0.6712  | -0.14     | 0.2622  |
| IDL-PL                   | 0.14      | 0.2664  | -0.16     | 0.2113  |
| IDL-apoB                 | 0.18      | 0.1430  | 0.01      | 0.9659  |
| <b>LDL</b>               |           |         |           |         |
| LDL-C                    | 0.12      | 0.3284  | 0.00      | 0.9752  |
| LDL1-C                   | 0.03      | 0.8105  | -0.01     | 0.9326  |
| LDL2-C                   | -0.02     | 0.8866  | 0.19      | 0.1291  |
| LDL3-C                   | 0.09      | 0.4981  | 0.02      | 0.8903  |
| LDL4-C                   | 0.19      | 0.1314  | -0.09     | 0.4818  |
| LDL5-C                   | 0.14      | 0.2731  | -0.09     | 0.4930  |
| LDL6-C                   | 0.10      | 0.4498  | -0.02     | 0.8468  |
| LDL-FC                   | 0.05      | 0.7180  | -0.02     | 0.8526  |
| LDL1-FC                  | 0.05      | 0.6777  | -0.02     | 0.8997  |
| LDL2-FC                  | -0.06     | 0.6302  | 0.17      | 0.1668  |
| LDL3-FC                  | -0.02     | 0.8995  | 0.00      | 0.9862  |
| LDL4-FC                  | 0.14      | 0.2684  | -0.08     | 0.5419  |
| LDL5-FC                  | 0.12      | 0.3401  | -0.08     | 0.5204  |
| LDL6-FC                  | 0.11      | 0.3844  | -0.04     | 0.7397  |

|              |       |        |       |        |
|--------------|-------|--------|-------|--------|
| LDL-TG       | 0.11  | 0.3757 | 0.11  | 0.3623 |
| LDL1-TG      | 0.08  | 0.5186 | 0.08  | 0.5381 |
| LDL2-TG      | 0.05  | 0.7004 | 0.19  | 0.1262 |
| LDL3-TG      | 0.01  | 0.9306 | 0.19  | 0.1294 |
| LDL4-TG      | 0.17  | 0.1858 | 0.12  | 0.3604 |
| LDL5-TG      | 0.11  | 0.3822 | 0.08  | 0.5490 |
| LDL6-TG      | 0.04  | 0.7510 | 0.12  | 0.3242 |
| LDL-PL       | 0.14  | 0.2699 | 0.03  | 0.7850 |
| LDL1-PL      | 0.05  | 0.6707 | 0.02  | 0.8611 |
| LDL2-PL      | 0.00  | 0.9977 | 0.19  | 0.1354 |
| LDL3-PL      | 0.09  | 0.4944 | 0.04  | 0.7679 |
| LDL4-PL      | 0.20  | 0.1023 | -0.09 | 0.4561 |
| LDL5-PL      | 0.14  | 0.2788 | -0.07 | 0.5756 |
| LDL6-PL      | 0.08  | 0.5186 | -0.03 | 0.8181 |
| LDL-apoB     | 0.15  | 0.2298 | 0.04  | 0.7233 |
| LDL1-apoB    | 0.06  | 0.6443 | 0.03  | 0.7826 |
| LDL2-apoB    | 0.00  | 0.9783 | 0.24  | 0.0591 |
| LDL3-apoB    | 0.09  | 0.4590 | 0.06  | 0.6336 |
| LDL4-apoB    | 0.20  | 0.1077 | -0.09 | 0.4578 |
| LDL5-apoB    | 0.14  | 0.2774 | -0.03 | 0.8004 |
| LDL6-apoB    | 0.09  | 0.4516 | 0.01  | 0.9394 |
| <b>HDL</b>   |       |        |       |        |
| HDL-C        | -0.16 | 0.1911 | -0.14 | 0.2624 |
| HDL1-C       | -0.18 | 0.1426 | 0.04  | 0.7313 |
| HDL2-C       | -0.06 | 0.6330 | 0.05  | 0.6938 |
| HDL3-C       | -0.05 | 0.7139 | -0.09 | 0.4601 |
| HDL4-C       | -0.04 | 0.7532 | -0.27 | 0.0298 |
| HDL-FC       | -0.18 | 0.1466 | -0.10 | 0.4121 |
| HDL1-FC      | -0.15 | 0.2412 | -0.08 | 0.5207 |
| HDL2-FC      | -0.02 | 0.8860 | -0.02 | 0.8571 |
| HDL3-FC      | -0.01 | 0.9262 | -0.12 | 0.3374 |
| HDL4-FC      | 0.01  | 0.9667 | -0.21 | 0.0998 |
| HDL-TG       | -0.05 | 0.7171 | -0.03 | 0.8087 |
| HDL1-TG      | -0.16 | 0.2080 | 0.02  | 0.9010 |
| HDL2-TG      | -0.02 | 0.8832 | 0.10  | 0.4228 |
| HDL3-TG      | 0.04  | 0.7328 | 0.08  | 0.5129 |
| HDL4-TG      | -0.01 | 0.9186 | -0.15 | 0.2257 |
| HDL-PL       | -0.12 | 0.3543 | -0.04 | 0.7348 |
| HDL1-PL      | -0.15 | 0.2281 | 0.10  | 0.4506 |
| HDL2-PL      | -0.05 | 0.7217 | 0.07  | 0.5588 |
| HDL3-PL      | -0.01 | 0.9161 | -0.05 | 0.6977 |
| HDL4-PL      | 0.04  | 0.7387 | -0.21 | 0.0980 |
| HDL-apoA-I   | -0.18 | 0.1516 | -0.23 | 0.0619 |
| HDL1-apoA-I  | -0.18 | 0.1572 | 0.04  | 0.7736 |
| HDL2-apoA-I  | -0.16 | 0.2043 | -0.02 | 0.8964 |
| HDL3-apoA-I  | -0.03 | 0.8146 | -0.08 | 0.5310 |
| HDL4-apoA-I  | -0.02 | 0.8469 | -0.31 | 0.0107 |
| HDL-apoA-II  | 0.04  | 0.7655 | -0.33 | 0.0081 |
| HDL1-apoA-II | -0.17 | 0.1742 | 0.03  | 0.8257 |
| HDL2-apoA-II | -0.07 | 0.5605 | 0.03  | 0.8204 |
| HDL3-apoA-II | 0.07  | 0.5929 | -0.10 | 0.4320 |
| HDL4-apoA-II | 0.02  | 0.9026 | -0.37 | 0.0025 |

Spearman correlation analyses were used to evaluate the associations between the serum levels of lipoproteins and CRP. *p*-values < 0.0005 are considered statistically significant after a Bonferroni correction for multiple testing. ApoA-I, apolipoprotein A-I; apoA-II, apolipoprotein A-II; apoB, apolipoprotein B; C, cholesterol; CRP, C-reactive

protein; FC, free cholesterol; HV, healthy volunteer; HDL, high-density lipoprotein; IDL, intermediate-density lipoprotein; LDL, low-density lipoprotein; MS, metabolic syndrome patient; PL, phospholipid;  $r$ , Spearman's correlation coefficient; TG, triglyceride; VLDL, very low-density lipoprotein.
