# Supplementary material for: Serum Levels of Adiponectin Are Strongly Associated with Lipoprotein Subclasses in Healthy Volunteers but Not in Patients with Metabolic Syndrome
Source: MDPI journal article supplement (doi:10.3390/ijms25095050), 2024-05-06
Supplement: s1 [file s1]

**Table S4.** Partial correlation analyses of serum levels of adiponectin with serum levels of LDL and HDL in patients with MS.

| Variable<br>(mg/dL) | Adiponectin (µg/mL) |        |         |        |         |        |         |        |
|---------------------|---------------------|--------|---------|--------|---------|--------|---------|--------|
|                     | Model 1             |        | Model 2 |        | Model 3 |        | Model 4 |        |
|                     | r                   | p      | r       | p      | r       | p      | r       | p      |
| LDL1-PL             | 0.38                | 0.0025 | 0.38    | 0.0026 | 0.38    | 0.0026 | 0.38    | 0.0022 |
| HDL-PL              | 0.38                | 0.0024 | 0.38    | 0.0027 | 0.38    | 0.0023 | 0.38    | 0.0025 |

Spearman partial correlation analyses were used to evaluate associations of the serum levels of adiponectin with the serum levels LDL1-PL and HDL-PL in patients with MS, while accounting for covariates. *p*-values < 0.0005 are considered statistically significant after a Bonferroni correction for multiple testing. Model 1: Adjusted for age, sex, and BMI. Model 2: Adjusted for age, sex, BMI, and CRP. Model 3: Adjusted for age, sex, and waist circumference. Model 4: Adjusted for age, sex, and MetSSS. HDL, high-density lipoprotein; LDL, MetSSS, metabolic syndrome severity score; PL, phospholipid; r, Spearman's correlation coefficient.
