# Supplementary material for: Serum Levels of Adiponectin Are Strongly Associated with Lipoprotein Subclasses in Healthy Volunteers but Not in Patients with Metabolic Syndrome
Source: MDPI journal article supplement (doi:10.3390/ijms25095050), 2024-05-06
Supplement: s1 [file s1]

**Table S11.** Correlation analyses of serum levels of lipoprotein classes and subclasses with IL-6, performed separately for the HVs and patients with MS.

| IL-6 (pg/mL)        |           |         |           |               |
|---------------------|-----------|---------|-----------|---------------|
| Variable<br>(mg/dL) | HV (N=65) |         | MS (N=65) |               |
|                     | r         | p-value | r         | p-value       |
| <b>VLDL</b>         |           |         |           |               |
| VLDL-C              | 0.20      | 0.1019  | -0.38     | 0.0018        |
| VLDL1-C             | 0.22      | 0.0808  | -0.41     | 0.0007        |
| VLDL2-C             | 0.23      | 0.0663  | -0.36     | 0.0031        |
| VLDL3-C             | 0.23      | 0.0636  | -0.33     | 0.0071        |
| VLDL4-C             | 0.21      | 0.1006  | -0.27     | 0.0291        |
| VLDL5-C             | 0.03      | 0.8311  | -0.02     | 0.8530        |
| VLDL-FC             | 0.17      | 0.1717  | -0.37     | 0.0021        |
| VLDL1-FC            | 0.24      | 0.0503  | -0.42     | 0.0006        |
| VLDL2-FC            | 0.21      | 0.0952  | -0.37     | 0.0027        |
| VLDL3-FC            | 0.19      | 0.1377  | -0.36     | 0.0032        |
| VLDL4-FC            | 0.20      | 0.1082  | -0.32     | 0.0093        |
| VLDL5-FC            | -0.18     | 0.1446  | -0.20     | 0.1152        |
| VLDL-TG             | 0.19      | 0.1289  | -0.38     | 0.0016        |
| VLDL1-TG            | 0.19      | 0.1358  | -0.40     | 0.0010        |
| VLDL2-TG            | 0.23      | 0.0649  | -0.36     | 0.0031        |
| VLDL3-TG            | 0.18      | 0.1592  | -0.35     | 0.0047        |
| VLDL4-TG            | 0.11      | 0.3687  | -0.30     | 0.0157        |
| VLDL5-TG            | -0.09     | 0.4739  | -0.06     | 0.6552        |
| VLDL-PL             | 0.18      | 0.1620  | -0.37     | 0.0024        |
| VLDL1-PL            | 0.24      | 0.0589  | -0.39     | 0.0013        |
| VLDL2-PL            | 0.25      | 0.0408  | -0.35     | 0.0038        |
| VLDL3-PL            | 0.18      | 0.1575  | -0.36     | 0.0030        |
| VLDL4-PL            | 0.18      | 0.1509  | -0.29     | 0.0185        |
| VLDL5-PL            | 0.03      | 0.8088  | -0.06     | 0.6109        |
| VLDL-apoB           | 0.14      | 0.2655  | -0.36     | 0.0032        |
| <b>IDL</b>          |           |         |           |               |
| IDL-C               | 0.26      | 0.0356  | -0.26     | 0.0343        |
| IDL-FC              | 0.26      | 0.0360  | -0.30     | 0.0141        |
| IDL-TG              | 0.17      | 0.1846  | -0.42     | <b>0.0004</b> |
| IDL-PL              | 0.27      | 0.0303  | -0.38     | 0.0016        |
| IDL-apoB            | 0.18      | 0.1547  | -0.23     | 0.0668        |
| <b>LDL</b>          |           |         |           |               |
| LDL-C               | 0.16      | 0.2053  | 0.11      | 0.3633        |
| LDL1-C              | 0.06      | 0.6503  | 0.09      | 0.4983        |
| LDL2-C              | -0.09     | 0.4579  | 0.37      | 0.0028        |
| LDL3-C              | 0.06      | 0.6493  | 0.20      | 0.1139        |
| LDL4-C              | 0.23      | 0.0695  | 0.04      | 0.7768        |
| LDL5-C              | 0.17      | 0.1835  | 0.00      | 0.9846        |
| LDL6-C              | 0.16      | 0.2033  | -0.09     | 0.4649        |
| LDL-FC              | 0.12      | 0.3327  | 0.14      | 0.2683        |
| LDL1-FC             | 0.09      | 0.4919  | 0.07      | 0.5893        |
| LDL2-FC             | -0.11     | 0.4035  | 0.34      | 0.0054        |
| LDL3-FC             | 0.03      | 0.8315  | 0.22      | 0.0722        |
| LDL4-FC             | 0.21      | 0.1005  | 0.08      | 0.5300        |
| LDL5-FC             | 0.17      | 0.1814  | 0.04      | 0.7247        |
| LDL6-FC             | 0.17      | 0.1800  | -0.04     | 0.7375        |

|              |       |        |       |        |
|--------------|-------|--------|-------|--------|
| LDL-TG       | 0.15  | 0.2328 | -0.07 | 0.6052 |
| LDL1-TG      | 0.07  | 0.5964 | -0.07 | 0.5716 |
| LDL2-TG      | 0.02  | 0.8542 | 0.19  | 0.1205 |
| LDL3-TG      | -0.11 | 0.3743 | 0.33  | 0.0074 |
| LDL4-TG      | 0.17  | 0.1658 | 0.12  | 0.3426 |
| LDL5-TG      | 0.17  | 0.1754 | -0.12 | 0.3397 |
| LDL6-TG      | 0.04  | 0.7527 | -0.02 | 0.8670 |
| LDL-PL       | 0.17  | 0.1877 | 0.16  | 0.2140 |
| LDL1-PL      | 0.03  | 0.7907 | 0.13  | 0.2920 |
| LDL2-PL      | -0.08 | 0.5516 | 0.37  | 0.0024 |
| LDL3-PL      | 0.06  | 0.6449 | 0.22  | 0.0852 |
| LDL4-PL      | 0.24  | 0.0556 | 0.03  | 0.7947 |
| LDL5-PL      | 0.17  | 0.1650 | 0.01  | 0.9529 |
| LDL6-PL      | 0.12  | 0.3248 | -0.09 | 0.4878 |
| LDL-apoB     | 0.18  | 0.1576 | 0.05  | 0.6803 |
| LDL1-apoB    | 0.02  | 0.8484 | 0.11  | 0.3663 |
| LDL2-apoB    | -0.11 | 0.3849 | 0.36  | 0.0029 |
| LDL3-apoB    | 0.06  | 0.6426 | 0.23  | 0.0706 |
| LDL4-apoB    | 0.24  | 0.0545 | -0.01 | 0.9656 |
| LDL5-apoB    | 0.18  | 0.1529 | 0.02  | 0.8969 |
| LDL6-apoB    | 0.15  | 0.2292 | -0.12 | 0.3597 |
| <b>HDL</b>   |       |        |       |        |
| HDL-C        | -0.16 | 0.2089 | 0.14  | 0.2540 |
| HDL1-C       | -0.14 | 0.2571 | 0.14  | 0.2704 |
| HDL2-C       | -0.10 | 0.4471 | 0.17  | 0.1720 |
| HDL3-C       | -0.04 | 0.7688 | 0.05  | 0.6672 |
| HDL4-C       | 0.06  | 0.6318 | 0.00  | 0.9916 |
| HDL-FC       | -0.13 | 0.3042 | 0.14  | 0.2781 |
| HDL1-FC      | -0.15 | 0.2370 | 0.11  | 0.3923 |
| HDL2-FC      | -0.11 | 0.3925 | 0.13  | 0.2991 |
| HDL3-FC      | -0.02 | 0.8921 | 0.07  | 0.5558 |
| HDL4-FC      | 0.11  | 0.3772 | 0.03  | 0.7859 |
| HDL-TG       | 0.00  | 0.9763 | -0.15 | 0.2250 |
| HDL1-TG      | -0.13 | 0.3192 | -0.04 | 0.7280 |
| HDL2-TG      | -0.04 | 0.7789 | -0.05 | 0.6771 |
| HDL3-TG      | 0.07  | 0.5777 | -0.16 | 0.2092 |
| HDL4-TG      | 0.10  | 0.4339 | -0.38 | 0.0017 |
| HDL-PL       | -0.16 | 0.1973 | 0.13  | 0.2966 |
| HDL1-PL      | -0.14 | 0.2625 | 0.16  | 0.2102 |
| HDL2-PL      | -0.15 | 0.2366 | 0.14  | 0.2722 |
| HDL3-PL      | -0.10 | 0.4371 | 0.06  | 0.6077 |
| HDL4-PL      | 0.09  | 0.4597 | -0.03 | 0.8060 |
| HDL-apoA-I   | -0.16 | 0.1906 | -0.05 | 0.7072 |
| HDL1-apoA-I  | -0.18 | 0.1512 | 0.12  | 0.3506 |
| HDL2-apoA-I  | -0.27 | 0.0281 | 0.07  | 0.6054 |
| HDL3-apoA-I  | -0.07 | 0.5596 | -0.03 | 0.8355 |
| HDL4-apoA-I  | 0.11  | 0.3891 | -0.11 | 0.3878 |
| HDL-apoA-II  | 0.02  | 0.8487 | -0.25 | 0.0429 |
| HDL1-apoA-II | -0.24 | 0.0567 | -0.03 | 0.7851 |
| HDL2-apoA-II | -0.24 | 0.0514 | -0.08 | 0.5424 |
| HDL3-apoA-II | 0.01  | 0.9544 | -0.16 | 0.2060 |
| HDL4-apoA-II | 0.12  | 0.3288 | -0.20 | 0.1018 |

Spearman correlation analyses were used to evaluate the associations between the serum levels of lipoproteins and IL-6. *p*-values < 0.0005 are considered statistically significant after a Bonferroni correction for multiple testing and are depicted in bold. ApoA-I, apolipoprotein A-I; apoA-II, apolipoprotein A-II; apoB, apolipoprotein B; C,

cholesterol; FC, free cholesterol; HV, healthy volunteer; HDL, high-density lipoprotein; IDL, intermediate-density lipoprotein; IL-6, interleukin-6; LDL, low-density lipoprotein; MS, metabolic syndrome patient; PL, phospholipid;  $r$ , Spearman's correlation coefficient; TG, triglyceride; VLDL, very low-density lipoprotein.
