# Supplementary material for: Serum Levels of Adiponectin Are Strongly Associated with Lipoprotein Subclasses in Healthy Volunteers but Not in Patients with Metabolic Syndrome
Source: MDPI journal article supplement (doi:10.3390/ijms25095050), 2024-05-06
Supplement: s1 [file s1]

**Table S7.** Logistic regression analyses to assess associations of lipoproteins and their subclasses with high vs. low adiponectin, separately in HVs and patients with MS.

| Adiponectin $\geq 15.1$ $\mu\text{g/mL}$ |                  |         | Adiponectin $\geq 13.0$ $\mu\text{g/mL}$ |         |
|------------------------------------------|------------------|---------|------------------------------------------|---------|
| Variable (mg/dL)                         | HV               |         | MS                                       |         |
|                                          | OR (95% CI)      | p-value | OR (95% CI)                              | p-value |
| <b>VLDL</b>                              |                  |         |                                          |         |
| VLDL-C                                   | 0.90 (0.84-0.96) | 0.0026  | 1.00 (0.98-1.02)                         | 0.7520  |
| VLDL1-C                                  | 0.75 (0.60-0.88) | 0.0023  | 0.99 (0.95-1.03)                         | 0.6661  |
| VLDL2-C                                  | 0.56 (0.36-0.80) | 0.0047  | 0.98 (0.86-1.10)                         | 0.7038  |
| VLDL3-C                                  | 0.64 (0.45-0.84) | 0.0039  | 0.98 (0.87-1.10)                         | 0.7573  |
| VLDL4-C                                  | 0.72 (0.55-0.92) | 0.0133  | 1.01 (0.87-1.17)                         | 0.8715  |
| VLDL5-C                                  | 1.24 (0.49-3.27) | 0.6479  | 1.62 (0.73-3.79)                         | 0.2474  |
| VLDL-FC                                  | 0.77 (0.63-0.90) | 0.0032  | 0.99 (0.93-1.04)                         | 0.6865  |
| VLDL1-FC                                 | 0.40 (0.22-0.64) | 0.0007  | 0.95 (0.83-1.08)                         | 0.4625  |
| VLDL2-FC                                 | 0.30 (0.12-0.62) | 0.0041  | 0.95 (0.75-1.18)                         | 0.6460  |
| VLDL3-FC                                 | 0.38 (0.18-0.69) | 0.0045  | 0.94 (0.75-1.16)                         | 0.5792  |
| VLDL4-FC                                 | 0.49 (0.28-0.81) | 0.0085  | 1.03 (0.80-1.35)                         | 0.8022  |
| VLDL5-FC                                 | 1.15 (0.26-5.11) | 0.8469  | 1.33 (0.58-3.67)                         | 0.5101  |
| VLDL-TG                                  | 0.96 (0.94-0.98) | 0.0012  | 1.00 (0.99-1.00)                         | 0.3564  |
| VLDL1-TG                                 | 0.93 (0.88-0.96) | 0.0008  | 1.00 (0.99-1.00)                         | 0.3839  |
| VLDL2-TG                                 | 0.84 (0.73-0.93) | 0.0036  | 0.98 (0.94-1.02)                         | 0.3113  |
| VLDL3-TG                                 | 0.85 (0.74-0.94) | 0.0067  | 0.98 (0.93-1.02)                         | 0.3675  |
| VLDL4-TG                                 | 0.80 (0.65-0.94) | 0.0148  | 0.96 (0.87-1.03)                         | 0.3014  |
| VLDL5-TG                                 | 1.21 (0.54-2.76) | 0.6413  | 1.08 (0.61-1.94)                         | 0.7957  |
| VLDL-PL                                  | 0.87 (0.79-0.94) | 0.0016  | 0.99 (0.95-1.02)                         | 0.4078  |
| VLDL1-PL                                 | 0.63 (0.47-0.80) | 0.0007  | 0.98 (0.91-1.03)                         | 0.3840  |
| VLDL2-PL                                 | 0.47 (0.28-0.72) | 0.0020  | 0.92 (0.77-1.08)                         | 0.3328  |
| VLDL3-PL                                 | 0.57 (0.38-0.79) | 0.0024  | 0.94 (0.80-1.07)                         | 0.3663  |
| VLDL4-PL                                 | 0.62 (0.42-0.86) | 0.0082  | 0.95 (0.79-1.14)                         | 0.6094  |
| VLDL5-PL                                 | 0.84 (0.36-1.91) | 0.6797  | 1.32 (0.63-2.83)                         | 0.4638  |
| VLDL-apoB                                | 0.74 (0.59-0.88) | 0.0025  | 0.98 (0.90-1.05)                         | 0.5592  |
| <b>IDL</b>                               |                  |         |                                          |         |
| IDL-C                                    | 0.85 (0.75-0.93) | 0.0020  | 1.00 (0.96-1.04)                         | 0.9846  |
| IDL-FC                                   | 0.55 (0.37-0.78) | 0.0015  | 1.00 (0.88-1.15)                         | 0.9534  |
| IDL-TG                                   | 0.83 (0.72-0.92) | 0.0024  | 0.99 (0.96-1.01)                         | 0.3900  |
| IDL-PL                                   | 0.67 (0.51-0.85) | 0.0021  | 0.99 (0.91-1.06)                         | 0.6777  |
| IDL-apoB                                 | 0.62 (0.44-0.83) | 0.0028  | 1.00 (0.87-1.15)                         | 0.9720  |
| <b>LDL</b>                               |                  |         |                                          |         |
| LDL-C                                    | 0.99 (0.97-1.01) | 0.3321  | 1.01 (1.00-1.03)                         | 0.1442  |
| LDL1-C                                   | 1.06 (0.99-1.13) | 0.0941  | 1.13 (1.06-1.24)                         | 0.0016  |
| LDL2-C                                   | 1.12 (1.04-1.21) | 0.0051  | 1.07 (0.99-1.16)                         | 0.0809  |
| LDL3-C                                   | 1.04 (0.96-1.13) | 0.3406  | 1.07 (1.01-1.14)                         | 0.0403  |
| LDL4-C                                   | 0.87 (0.78-0.95) | 0.0033  | 1.04 (0.99-1.10)                         | 0.1320  |
| LDL5-C                                   | 0.81 (0.71-0.90) | 0.0003  | 0.98 (0.92-1.05)                         | 0.6169  |
| LDL6-C                                   | 0.86 (0.76-0.95) | 0.0059  | 0.97 (0.92-1.01)                         | 0.1882  |
| LDL-FC                                   | 0.99 (0.93-1.06) | 0.8593  | 1.05 (1.00-1.11)                         | 0.0624  |
| LDL1-FC                                  | 1.21 (0.98-1.55) | 0.0917  | 1.56 (1.21-2.12)                         | 0.0016  |
| LDL2-FC                                  | 1.47 (1.16-1.96) | 0.0037  | 1.31 (1.00-1.76)                         | 0.0596  |
| LDL3-FC                                  | 1.33 (1.00-1.83) | 0.0630  | 1.35 (1.06-1.77)                         | 0.0215  |
| LDL4-FC                                  | 0.67 (0.46-0.94) | 0.0289  | 1.23 (0.99-1.56)                         | 0.0709  |
| LDL5-FC                                  | 0.49 (0.31-0.72) | 0.0008  | 0.99 (0.77-1.27)                         | 0.9096  |
| LDL6-FC                                  | 0.61 (0.38-0.90) | 0.0226  | 0.84 (0.65-1.05)                         | 0.1537  |

|              |                   |        |                  |        |
|--------------|-------------------|--------|------------------|--------|
| LDL-TG       | 0.91 (0.81-1.01)  | 0.0969 | 1.00 (0.96-1.05) | 0.9031 |
| LDL1-TG      | 1.00 (0.77-1.29)  | 0.9724 | 1.02 (0.92-1.15) | 0.7148 |
| LDL2-TG      | 1.53 (0.81-3.05)  | 0.1980 | 1.40 (0.88-2.45) | 0.1822 |
| LDL3-TG      | 1.79 (0.84-4.02)  | 0.1422 | 1.71 (0.93-3.42) | 0.1016 |
| LDL4-TG      | 0.44 (0.23-0.78)  | 0.0091 | 1.17 (0.84-1.69) | 0.3609 |
| LDL5-TG      | 0.32 (0.16-0.57)  | 0.0005 | 0.91 (0.67-1.20) | 0.5208 |
| LDL6-TG      | 0.61 (0.33-1.05)  | 0.0869 | 0.84 (0.62-1.05) | 0.2007 |
| LDL-PL       | 0.99 (0.95-1.03)  | 0.4981 | 1.02 (1.00-1.05) | 0.1011 |
| LDL1-PL      | 1.12 (1.00-1.29)  | 0.0719 | 1.31 (1.13-1.58) | 0.0012 |
| LDL2-PL      | 1.25 (1.09-1.49)  | 0.0039 | 1.17 (1.01-1.38) | 0.0452 |
| LDL3-PL      | 1.10 (0.93-1.30)  | 0.2689 | 1.14 (1.02-1.31) | 0.0325 |
| LDL4-PL      | 0.76 (0.62-0.90)  | 0.0033 | 1.09 (0.99-1.22) | 0.1013 |
| LDL5-PL      | 0.66 (0.51-0.80)  | 0.0003 | 0.97 (0.86-1.10) | 0.6220 |
| LDL6-PL      | 0.77 (0.61-0.94)  | 0.0161 | 0.93 (0.84-1.03) | 0.1833 |
| LDL-apoB     | 0.97 (0.94-1.00)  | 0.0878 | 1.01 (0.99-1.04) | 0.2911 |
| LDL1-apoB    | 1.13 (1.00-1.30)  | 0.0727 | 1.32 (1.13-1.59) | 0.0012 |
| LDL2-apoB    | 1.23 (1.07-1.46)  | 0.0068 | 1.15 (0.99-1.35) | 0.0677 |
| LDL3-apoB    | 1.06 (0.92-1.24)  | 0.4092 | 1.14 (1.02-1.30) | 0.0305 |
| LDL4-apoB    | 0.78 (0.65-0.90)  | 0.0014 | 1.07 (0.98-1.17) | 0.1434 |
| LDL5-apoB    | 0.74 (0.61-0.85)  | 0.0002 | 0.97 (0.88-1.07) | 0.5590 |
| LDL6-apoB    | 0.82 (0.70-0.92)  | 0.0041 | 0.97 (0.92-1.02) | 0.2517 |
| <b>HDL</b>   |                   |        |                  |        |
| HDL-C        | 1.11 (1.06-1.19)  | 0.0003 | 1.05 (1.00-1.10) | 0.0611 |
| HDL1-C       | 1.19 (1.10-1.33)  | 0.0003 | 1.10 (1.00-1.23) | 0.0527 |
| HDL2-C       | 1.81 (1.37-2.58)  | 0.0002 | 1.27 (1.02-1.66) | 0.0478 |
| HDL3-C       | 1.58 (1.16-2.23)  | 0.0061 | 1.22 (0.99-1.57) | 0.0787 |
| HDL4-C       | 0.93 (0.82-1.05)  | 0.2302 | 1.00 (0.92-1.09) | 0.9688 |
| HDL-FC       | 1.50 (1.23-1.93)  | 0.0003 | 1.32 (1.10-1.65) | 0.0067 |
| HDL1-FC      | 1.97 (1.40-3.04)  | 0.0005 | 1.65 (1.11-2.65) | 0.0214 |
| HDL2-FC      | 7.44 (2.56-27.42) | 0.0008 | 2.36 (1.04-6.07) | 0.0525 |
| HDL3-FC      | 2.19 (0.82-6.24)  | 0.1270 | 1.77 (0.94-3.60) | 0.0900 |
| HDL4-FC      | 0.78 (0.46-1.27)  | 0.3198 | 1.19 (0.84-1.76) | 0.3410 |
| HDL-TG       | 1.06 (0.89-1.27)  | 0.5206 | 1.04 (0.95-1.14) | 0.4144 |
| HDL1-TG      | 1.66 (1.17-2.58)  | 0.0110 | 1.07 (0.91-1.32) | 0.4314 |
| HDL2-TG      | 1.64 (0.70-4.02)  | 0.2590 | 1.19 (0.79-1.91) | 0.4240 |
| HDL3-TG      | 0.57 (0.24-1.30)  | 0.1910 | 1.09 (0.73-1.67) | 0.6700 |
| HDL4-TG      | 0.35 (0.17-0.65)  | 0.0018 | 1.06 (0.65-1.73) | 0.8173 |
| HDL-PL       | 1.11 (1.06-1.17)  | 0.0002 | 1.04 (1.01-1.08) | 0.0278 |
| HDL1-PL      | 1.16 (1.08-1.27)  | 0.0002 | 1.12 (1.03-1.23) | 0.0172 |
| HDL2-PL      | 1.52 (1.25-1.96)  | 0.0002 | 1.16 (1.01-1.37) | 0.0419 |
| HDL3-PL      | 1.33 (1.09-1.67)  | 0.0083 | 1.11 (0.98-1.28) | 0.1192 |
| HDL4-PL      | 0.93 (0.83-1.04)  | 0.2435 | 1.01 (0.95-1.09) | 0.6746 |
| HDL-apoA-I   | 1.05 (1.03-1.09)  | 0.0008 | 1.03 (1.00-1.05) | 0.0300 |
| HDL1-apoA-I  | 1.10 (1.05-1.17)  | 0.0003 | 1.07 (1.01-1.14) | 0.0314 |
| HDL2-apoA-I  | 1.36 (1.17-1.65)  | 0.0003 | 1.10 (0.98-1.25) | 0.1123 |
| HDL3-apoA-I  | 1.20 (1.05-1.39)  | 0.0107 | 1.08 (1.00-1.18) | 0.0775 |
| HDL4-apoA-I  | 0.96 (0.91-1.00)  | 0.0656 | 1.01 (0.98-1.04) | 0.4758 |
| HDL-apoA-II  | 0.94 (0.82-1.07)  | 0.3741 | 1.03 (0.94-1.15) | 0.5005 |
| HDL1-apoA-II | 2.40 (1.52-4.26)  | 0.0007 | 1.24 (0.86-1.86) | 0.2642 |
| HDL2-apoA-II | 2.22 (1.20-4.52)  | 0.0172 | 1.10 (0.78-1.58) | 0.6009 |
| HDL3-apoA-II | 0.85 (0.52-1.37)  | 0.5099 | 1.07 (0.83-1.40) | 0.5931 |
| HDL4-apoA-II | 0.81 (0.68-0.93)  | 0.0067 | 0.99 (0.88-1.11) | 0.8369 |

Results are presented as odds ratios (ORs) and 95% confidence interval (CI) per increase in one unit (mg/dL) of (A) LDL and (B) HDL parameters. HVs with adiponectin <15.1 µg/mL belong to low (N=33) and those with adiponectin ≥15.1 µg/mL to high adiponectin group (N=32). Patients with MS with adiponectin <13.0 µg/mL belong to low

(N=33) and those with adiponectin  $\geq 13.0$   $\mu\text{g/mL}$  to high adiponectin group (N=32).  $p$ -values  $< 0.0005$  are considered statistically significant after a Bonferroni correction for multiple testing. Significant parameters as well as their respective ORs and 95% CIs are depicted in red. In MS, the parameters, ORs, and 95% CIs depicted in purple are those with the highest VIP scores in OPLS-DA analysis. ApoA-I, apolipoprotein A-I; apoA-II, apolipoprotein A-II; apoB, apolipoprotein B; C, cholesterol; FC, free cholesterol; HDL, high-density lipoprotein; HV, healthy volunteer; IDL, intermediate-density lipoprotein; LDL, low-density lipoprotein; MS, metabolic syndrome patient; PL, phospholipid; TG, triglyceride; VIP, variable of importance projection.
